# Supplementary material for: Transcriptional and metabolic adaptation of human neurons to the mitochondrial toxicant MPP+
Source: PubMed Central journal article supplement — Cell Death Dis. 2014 May 8;5(5):e1222–. doi: 10.1038/cddis.2014.166 (PMC4047858; doi:10.1038/cddis.2014.166), 2014-05-08
Supplement: cddis2014166x2.pdf [file cddis2014166x2.pdf]

## Table of Content

This excel file consists of all together 6 sheets:

|         |                                                                                                                                                                        |
|---------|------------------------------------------------------------------------------------------------------------------------------------------------------------------------|
| Sheet 1 | <b>Table of Content</b>                                                                                                                                                |
| Sheet 2 | Suppl. Table S1 - significantly altered metabolites measured with the accurate-mass Q-TOF LC-MS system (Agilent, Santa Clara, CA)                                      |
| Sheet 3 | Suppl. Table S2 - differentially regulated probe sets (PS) clustered according to the Pearson's correlation of their expression values across samples (cluster 1 to 4) |
| Sheet 4 | Suppl. Table S3 - differentially regulated genes of RNA sequencing analysis                                                                                            |
| Sheet 5 | Suppl. Table S4 - GO term enrichment of microarray determined transcripts changes                                                                                      |
| Sheet 6 | Suppl. Table S5 - GO term enrichment of RNAseq determined transcripts changes                                                                                          |

### • Supplementary Table S1

**Table S1 shows significantly altered metabolites of LUHMES cells (day 8 of differentiation) treated for 24 h or 36 h with 5  $\mu$ M MPP<sup>+</sup>, respectively**

significant metabolites (Benjamini-Hochberg false discovery rate (FDR) corrected,  $p < 0.05$ ) of 4 independent experiments

displayed are:

- Compound name: compound name of identified metabolites were assigned dependent on their determined mass by the MassHunter Acquisition software (Agilent Technologies) and are displayed in alphabetical order
- RT = retention time determined by either the TARGA® (Higgins, Mountain View, CA) C18 column (reverse phase separation) or the Cogent Diamond Hydride™ (MicroSol, Eatontown, NJ) column (aqueous normal phase (ANP)), respectively
- determined mass and formula of metabolites of the HPLC-MS system

### • Supplementary Table S2

**Data on Affymetrix DNA microarrays of LUHMES cells (day 8 of differentiation) treated for various exposure times with 5  $\mu$ M MPP<sup>+</sup>**

significant PS (Benjamini-Hochberg false discovery rate (FDR) adjusted LIMMA t-test,  $p < 0.05$ ) clustered according to the Pearson's correlation of their expression values across samples (cluster 1 to 4)

displayed are for every cluster:

- gene names of significantly regulated PS in comparison with control
- the corresponding fold changes of the PS ( $< 1$  = down regulated;  $> 1$  = up regulated)

### • Supplementary Table S3

**Data on RNA sequencing analysis of LUHMES cells (day 8 of differentiation) treated for various exposure times with 5  $\mu$ M MPP<sup>+</sup>**

significant genes (Benjamini-Hochberg false discovery rate (FDR) adjusted  $p < 0.05$ , fold change cutoff  $> 2$ )

displayed are:

- gene names of significantly regulated genes in comparison with control for every timepoint
- the corresponding p-values together with the FDR corrected p-values (in case the corresponding gene was not expressed in controls the p-value is 0)
- the corresponding fold changes of the genes ( $\log_2 < 1$  = down regulated;  $> 1$  = up regulated)

### • Supplementary Table S4

**GO term analysis of significantly regulated genes (Cluster 1 to 4) determined with Affymetrix DNA microarray analysis**

displayed are for every cluster:

- GO terms with a group size less than 1000 genes and a p-value  $< 0.05$

### • Supplementary Table S5

**GO term analysis of significantly regulated genes determined with RNAseq analysis**

displayed are:

- GO terms with a group size less than 1000 genes and a p-value  $< 0.05$

| Compound Name                         | RT         | Mass       | Formula           | Ctrl_01    | Ctrl_02    | Ctrl_03    | Ctrl_04    | MPP+ 24hr_01 | MPP+ 24hr_02 | MPP+ 24hr_03 | MPP+ 24hr_04 | MPP+ 36hr_01 | MPP+ 36hr_02 | MPP+ 36hr_03 | MPP+ 36hr_04 |
|---------------------------------------|------------|------------|-------------------|------------|------------|------------|------------|--------------|--------------|--------------|--------------|--------------|--------------|--------------|--------------|
| Adenine                               | 2.1781995  | 135.05477  | C5H5N5            | 40607.45   | 58925.195  | 77722.266  | 53540.266  | 78978.414    | 84872.44     | 78455.95     | 72408.984    | 102521.36    | 105978.914   | 88122.164    | 104451.66    |
| ADP                                   | 9.723      | 427.0298   | C10 H15 N5 O10 P2 | 360538     | 318038     | 349372     | 317035     | 755968       | 600269       | 665181       | 457860       | 416674       | 593621       | 599007       | 513975       |
| AMP                                   | 12.434957  | 347.0626   | C10H14N5O7P       | 75381.45   | 67980.31   | 68211.76   | 74099.39   | 142836.7     | 113618.695   | 100026.44    | 104293.26    | 158904.73    | 137167.92    | 98644.41     | 107707.33    |
| ATP                                   | 11.505     | 506.9963   | C10 H16 N5 O13 P3 | 1806769    | 1878634    | 1979811    | 1974819    | 1622099      | 1414853      | 1751798      | 1520377      | 959200       | 1163486      | 1229920      | 1169729      |
| Cholesterol sulfate                   | 1.3367423  | 466.29253  | C28H38N2O4        | 185089.08  | 142140.36  | 179658.03  | 218829.11  | 212582.8     | 162288.72    | 176680.7     | 201570.92    | 299953       | 275049.28    | 250498.53    | 397019.38    |
| Creatine                              | 10.577028  | 131.06946  | C4H9N3O2          | 42126.69   | 26476.578  | 31364.496  | 34543.758  | 67844.31     | 61893.062    | 44136.414    | 51768.105    | 58392.805    | 80867.32     | 69146.12     | 67564.086    |
| Cyclic ADP-ribose                     | 11.485415  | 541.0605   | C15H21N5O13P2     | 56026.418  | 68471.76   | 70421.81   | 74199.84   | 53886.492    | 47011.895    | 51683.332    | 44601.76     | 40287.14     | 50420.332    | 51128.613    | 43550.008    |
| Decanoic acid                         | 1.6112002  | 172.14618  | C10H20O2          | 85791.48   | 140094.03  | 141233.66  | 121607.125 | 110419.83    | 79033.28     | 95197.01     | 83774.05     | 65347.363    | 77575.14     | 56458.395    | 75893.79     |
| Dehydroascorbate                      | 7.2823024  | 174.01546  | C6H6O6            | 99658.04   | 131044.66  | 144882.72  | 189709.2   | 35411.38     | 16704.885    | 36309.332    | 23490.172    | 7727.3574    | 6110.7964    | 4931.632     | 1782.0905    |
| Deoxyribose                           | 2.6722124  | 134.05797  | C5H10O4           | 3714.784   | 1401.348   | 1971.2908  | 2438.527   | 100530.58    | 115010.95    | 63571.395    | 73784.47     | 14645.808    | 60875.766    | 38806.824    | 65451.74     |
| Deoxyuridine                          | 3.370509   | 228.08425  | C9H12N2O5         | 365860.8   | 270048.44  | 269572.28  | 494981.25  | 69955.45     | 77444.74     | 100827.516   | 14982.2295   | 143163.34    | 149336.11    | 68868.984    | 68331.56     |
| D-Erythrose                           | 2.6886003  | 120.042865 | C4H8O4            | 320919.2   | 285411.1   | 215730.28  | 261257.72  | 96153.24     | 111526.55    | 98851.26     | 104913.64    | 102294.305   | 86490.81     | 51532.74     | 97273.47     |
| D-Glucose                             | 4.826493   | 180.06346  | C6H12O6           | 1.38E+07   | 1.20E+07   | 1.18E+07   | 1.30E+07   | 9897048      | 7425680      | 3589317.5    | 7739301.5    | 5120492      | 4354011      | 3561507      | 3569824.8    |
| Dihydropteroate                       | 10.162604  | 314.1199   | C14H14N6O3        | 9527.617   | 2715.2349  | 317.15     | 9527.617   | 93628.96     | 43888.73     | 23479.592    | 36642.12     | 26453.123    | 55552.156    | 28073.357    | 51371.992    |
| Formyl-N-acetyl-5-methoxykynurenamine | 23.817293  | 264.10466  | C13H16N2O4        | 67351.44   | 120978.36  | 89555.02   | 142495.11  | 379972.2     | 401840.7     | 361116.28    | 347136.66    | 113237.54    | 252562.77    | 153243.52    | 167437.44    |
| Glutathione                           | 10.6726675 | 307.08354  | C10H17N3O6S       | 1867814.1  | 1613400.2  | 1777952.1  | 1674870.6  | 874413.5     | 671047.25    | 990454.8     | 709436.75    | 720626.7     | 642681.4     | 670754.75    | 527599.06    |
| Guanine                               | 2.4088476  | 151.00191  | C5H5N5O           | 1018317.1  | 820260.7   | 728080.1   | 866756.6   | 824613.1     | 843096.8     | 927543.94    | 814570.3     | 598873.8     | 479639.75    | 452681.16    | 594494       |
| Inosine                               | 6.8681207  | 268.0794   | C10H12N4O5        | 18818.82   | 12790.485  | 39622.48   | 35664.176  | 5765.666     | 5715.9688    | 13983.504    | 7488.7207    | 4641.0454    | 4196.2485    | 15027.879    | 2778.881     |
| L-Alanine                             | 9.489417   | 89.04823   | C3H7NO2           | 1034660.25 | 1006553.44 | 999091.75  | 1108385.4  | 948243.7     | 756566.75    | 844435.06    | 761661.94    | 608824.3     | 639601.3     | 613329.3     | 544507.94    |
| L-Arginine                            | 23.138628  | 174.11176  | C6H14N4O2         | 60722.188  | 64665.105  | 71004.28   | 73002      | 175977.98    | 148180.19    | 143749.39    | 123128.91    | 174912.11    | 207335.97    | 181636.16    | 202685.67    |
| L-Asparagine                          | 12.200896  | 132.05374  | C4H8N2O3          | 126552.95  | 113776.19  | 198501.14  | 148497.6   | 196609.95    | 107498.99    | 106585.914   | 98206.414    | 14731.561    | 64383.266    | 45822.434    | 31869.273    |
| L-Cystathionine                       | 2.9496076  | 222.0197   | C7H14N2O4S        | 63233.645  | 193777.6   | 212602.56  | 187926.03  | 1329132.6    | 1374997      | 1208704.5    | 1593119.4    | 1296536      | 1418606.2    | 1319542.1    | 1330715.8    |
| L-Glutamate                           | 10.226167  | 147.05391  | C5H9NO4           | 1.01E+07   | 9216675    | 9923687    | 9854769    | 5601552.5    | 4977763.5    | 6259856      | 5012702.5    | 4366909.5    | 4346674      | 4452911.5    | 3396162.2    |
| L-Lactate                             | 2.9537504  | 90.03222   | C3H6O3            | 1.72E+07   | 1.98E+07   | 2.23E+07   | 1.96E+07   | 5.33E+07     | 4.58E+07     | 3.98E+07     | 4.13E+07     | 4.99E+07     | 4.84E+07     | 3.79E+07     | 5.77E+07     |
| L-Lysine                              | 23.748032  | 146.10576  | C6H14N2O2         | 101994.32  | 117121.414 | 120259.88  | 134159.89  | 247120.4     | 236044.6     | 204651.31    | 187567.73    | 208855.39    | 268343.97    | 213859.83    | 240677.66    |
| L-Methionine S-oxide                  | 4.358      | 165.0463   | C5H11NO3S         | 38107      | 51345      | 61278      | 80709      | 203000       | 173972       | 172572       | 136208       | 160540       | 189848       | 187255       | 181051       |
| L-Phenylalanine                       | 6.768417   | 165.07913  | C9H11NO2          | 2089258.5  | 1813205.8  | 1975657.5  | 2071265.6  | 3267437.5    | 2615317.5    | 2774696.8    | 2463539      | 2685109.2    | 2927524      | 2664104.5    | 2635191.8    |
| L-Proline                             | 10.2196665 | 115.06374  | C5H9NO2           | 646367.4   | 536469.2   | 537908.56  | 609392.25  | 559182.5     | 424750.7     | 442680.16    | 418559.2     | 453294.25    | 476266.2     | 449878.12    | 459828.5     |
| L-Serine                              | 10.010499  | 105.0431   | C3H7NO3           | 349185.34  | 287490.44  | 283750.38  | 353662.34  | 475505.66    | 356135.4     | 404336.8     | 346832.9     | 261588.72    | 306065.2     | 267956.88    | 226886.52    |
| L-Tryptophan                          | 6.4051666  | 204.08982  | C11H12N2O2        | 506895.9   | 415345.3   | 466814.44  | 467882.4   | 868277.56    | 669713.5     | 741179.75    | 619144.75    | 729658.9     | 784930.3     | 720356.1     | 667618.25    |
| L-Tyrosine                            | 6.929176   | 181.07373  | C9H11NO3          | 1862030.8  | 1538403.4  | 1629637.2  | 1686151    | 2753602.8    | 2193538.8    | 2323320.2    | 2049571      | 2286956.5    | 2380934.5    | 2177387      | 2111619.8    |
| Maleamate                             | 9.544883   | 115.0272   | C4H5NO3           | 80365.7    | 82927.21   | 95897.12   | 81837.836  | 76620.96     | 65992.17     | 79353.88     | 70288.61     | 58737.59     | 50493.52     | 66178.3      | 39664.195    |
| N-Acetyl-L-aspartate                  | 9.540916   | 175.0484   | C6H9NO5           | 1.18E+07   | 1.13E+07   | 1.25E+07   | 1.18E+07   | 1.00E+07     | 7920360      | 1.00E+07     | 7963129.5    | 6985687      | 6678941.5    | 7448899.5    | 4844487.5    |
| N-Acetyl-L-glutamate                  | 9.6699915  | 189.0638   | C7H11NO5          | 155744.19  | 128450.31  | 167225.77  | 142205.3   | 191509.81    | 132000.42    | 117790.62    | 130086.43    | 107706.1     | 85702.02     | 119736.336   | 58279.754    |
| O-Acetyl-L-homoserine                 | 3.8069165  | 161.06884  | C6H11NO4          | 289241.47  | 341635.3   | 346845.7   | 332162.62  | 192073       | 273951.47    | 250863.52    | 281677.22    | 203413.22    | 229528.69    | 251971.44    | 209584.77    |
| O-Acetylneuraminic acid               | 5.2280836  | 309.10567  | C11H19NO9         | 481787.03  | 456668.5   | 631966.56  | 595101.75  | 692910.94    | 607542.44    | 1029919.44   | 741259.8     | 333617.1     | 206266.28    | 147377.98    | 216954       |
| Pantothenate                          | 4.300334   | 219.11072  | C9H17NO5          | 8346518.5  | 9565469    | 959150     | 3793239    | 6526578      | 7123547      | 6228088.5    | 4139945.2    | 5301758.5    | 5311570      | 4836388      |              |
| Phosphocreatine                       | 14.838637  | 211.03563  | C4H10N3O5P        | 84803.43   | 96685.18   | 90541.945  | 114900.93  | 7423.1445    | 19684.762    | 25701.691    | 23664.252    | 7370.3477    | 6794.3467    | 639.1396     | 3328.3486    |
| Pyruvate                              | 2.9562547  | 88.01653   | C3H4O3            | 9851.836   | 32774.375  | 10161.3545 | 43575.984  | 121153.75    | 124921.25    | 102119.664   | 105626.664   | 108890.414   | 124112.95    | 113716.97    | 129545.89    |
| S-Adenosyl-L-homocysteine             | 6.911      | 384.1278   | C14 H20 N6 O5 S   | 55675      | 50046      | 44906      | 88516      | 85255        | 88516        | 62561        | 83277        | 58890        | 77735        | 38938        | 90307        |
| S-Adenosyl-L-methionine               | 2.779      | 398.1363   | C15H22N6O5S       | 93447      | 132966     | 130589     | 88683      | 266547       | 284441       | 283516       | 296903       | 260733       | 253557       | 154246       | 296538       |
| S-Methyl GSH                          | 12.328221  | 321.0693   | C11H19N3O6S       | 629013.2   | 752099.6   | 724681.75  | 770441.6   | 788880.06    | 769169.7     | 762900.8     | 789882.2     | 514164.62    | 670876       | 572745.7     | 594404.44    |
| sn-glycero-3-Phosphoethanolamine      | 11.822831  | 215.05585  | C5H14NO6P         | 797250.75  | 601546.94  | 569640.9   | 602335.25  | 471181.97    | 324394.53    | 350381       | 343490.88    | 478407.8     | 389354.3     | 321441.3     | 366071.16    |
| Sorbitol                              | 3.5053332  | 182.07923  | C13H11O0          | 2.20E+07   | 1.69E+07   | 1.69E+07   | 3.02E+07   | 9236348      | 6603022      | 8343833.5    | 4049342.8    | 1.01E+07     | 1.03E+07     | 7519059      | 5852104      |
| Taurine                               | 4.885      | 125.0153   | C2 H7 N O3 S      | 71391      | 46737      | 59527      | 56311      | 43142        | 30612        | 42536        | 34219        | 41658        | 28473        | 41357        | 28304        |
| Thiamine acetic acid                  | 3.109751   | 279.09947  | C12H15N4O2S       | 67333.02   | 67835.75   | 69488.03   | 55950.332  | 139756.08    | 126292.14    | 147104.3     | 97391.9      | 140063.52    | 135186.78    | 118627.766   | 142601.66    |
| UDP-alpha-D-galactose                 | 7.450355   | 566.05474  | C15H24N2O17P2     | 2060203.8  | 1543532.2  | 2952886.8  | 1351755.5  | 298676.22    | 220119.17    | 216542.4     | 190657.22    | 169850.31    | 121474.18    | 163083.44    | 51489.754    |
| UDP-glucose                           | 7.430962   | 283.02855  | C15H24N2O17P2     | 346245.56  | 363072.2   | 404863.6   | 353609.1   | 64305.54     | 48714.906    | 55290.58     | 35299.902    | 25774.486    | 18699.396    | 13707.843    | 9857.748     |
| UDP-N-acetyl-D-galactosamine          | 7.6207376  | 303.54088  | C17H27N3O17P2     | 846070     | 672672.6   | 744038.3   | 735078.56  | 391983.62    | 434384.84    | 580545.25    | 324935.3     | 568335.06    | 541702.94    | 620861.3     | 452233.44    |
| UDP-N-acetyl-D-Glucosamine            | 7.6651073  | 607.0812   | C17H27N3O17P2     | 7376378.5  | 4276028    | 1.14E+07   | 5088489.5  | 2432887.2    | 800899.44    | 2534102.2    | 772613.9     | 437506.8     | 1298282.6    | 3328190.2    | 914853.3     |
| Urate-3-ribonucleoside                | 6.408447   | 300.0776   | C13H16O8          | 39090.957  | 46053.11   | 51405.406  | 44171.78   | 86029.45     | 59865.348    | 69050.055    | 55793.58     | 70858.85     | 71822.47     | 66285.45     | 66174.09     |
| 2,3-Dimethylmaleate                   | 2.6667614  | 144.04251  | C6H8O4            | 42628.082  | 38130.625  | 35829.625  | 35280.055  | 5254.236     | 5944.4795    | 7813.291     | 5304.854     | 13772.049    | 11707.922    | 5092.716     | 10738.02     |
| 2,5-Dioxopentanoate                   | 7.448839   | 130.02747  | C5H6O4            | 78220.85   | 94884.09   | 101088.164 | 110651.86  | 66482.32     | 54311.074    | 65209.285    | 32749.123    | 6659.6245    | 8320.937     | 14100.248    | 6993.9663    |
| 2-Acetolactate                        | 9.812925   | 132.04303  | C5H8O4            | 18777.96   | 5291.098   | 5428.676   | 2601.509   | 106356.55    | 125830.21    | 113057.625   | 127384.61    | 45780.613    | 60006.535    | 38237.223    | 53201.707    |
| 3-(4-Hydroxyphenyl)lactate            | 1.9337083  | 182.0581   | C9H10O4           | 60591.79   | 43946.316  | 52934.535  | 55151.31   | 229440.75    | 303302.75    | 215976.67    | 255865.56    | 194081.33    | 260543.95    | 166126.52    | 228082.89    |
| 3-Methyl-2-oxobutanoic acid           | 1.9347128  | 116.0478   | C5H8O3            | 5558.974   | 6629.779   | 5284.111   | 1512.1465  | 67625.28     | 100198.57    | 74112.445    | 94388.24     | 78841.77     | 81506.74     | 29836.568    | 102588.016   |
| 3-Oxopropanoate                       | 4.8347306  | 88.01668   | C3H4O3            | 88921.23   | 134018.16  | 1          |            |              |              |              |              |              |              |              |              |



| Compound Name        | RT        | Mass      | Formula | Ctrl_01   | Ctrl_02    | Ctrl_03    | Ctrl_04   | MPP+ 24hr_01 | MPP+ 24hr_02 | MPP+ 24hr_03 | MPP+ 24hr_04 | MPP+ 36hr_01 | MPP+ 36hr_02 | MPP+ 36hr_03 | MPP+ 36hr_04 |
|----------------------|-----------|-----------|---------|-----------|------------|------------|-----------|--------------|--------------|--------------|--------------|--------------|--------------|--------------|--------------|
| 133.01398@11.78093   | 11.780929 | 134.02178 |         | 145448.5  | 759588.25  | 350900.75  | 568475.56 | 17615.268    | 28450.744    | 30891.262    | 39011.93     | 206.59311    | 943.7443     | 145.28394    | 278.555      |
| 134.86569@1.8863314  | 1.8863314 | 135.87349 |         | 106264.63 | 101538.09  | 106769.266 | 116406.29 | 132684.12    | 105106.54    | 127180.336   | 102582.22    | 139226.9     | 138657.23    | 167002.2     | 127326.46    |
| 136.86316@1.885491   | 1.8854905 | 137.87096 |         | 39994     | 42091.38   | 37412.86   | 44599.125 | 40456.812    | 39104.14     | 48635.96     | 38844.75     | 55099.38     | 46440.914    | 65738.83     | 55357.855    |
| 146.07918@4.65306    | 4.65306   | 147.08698 |         | 113441.47 | 163448.77  | 113192.195 | 211388.22 | 65001.105    | 47331.01     | 59251.71     | 43540.992    | 52913.574    | 65299.297    | 96682.4      | 95968.15     |
| 146.0796@4.255173    | 4.255173  | 147.0874  |         | 199176.06 | 217813.31  | 205613.22  | 262262.16 | 74446.49     | 127735.81    | 101418.18    | 102392.34    | 81883.55     | 109147.945   | 96682.4      | 85111.47     |
| 146.15578@10.225205  | 10.225205 | 147.16358 |         | 239808.64 | 212390.23  | 228652.78  | 232361.67 | 96644.836    | 82153.09     | 101228.17    | 80464.625    | 72160.64     | 72742.984    | 74398.125    | 58316.36     |
| 146.19092@10.229674  | 10.229674 | 147.19872 |         | 52036.305 | 46831.785  | 48187.105  | 50405.258 | 34740.09     | 28435.377    | 37085.406    | 29921.965    | 25856.43     | 26871.514    | 28276.205    | 20141.236    |
| 148.9902@2.9361804   | 2.9361804 | 149.998   |         | 12510.936 | 7692.444   | 9646.862   | 5849.9194 | 67097.15     | 57633.16     | 57802.49     | 64242.566    | 60105.902    | 70837.06     | 60275.293    | 59842.363    |
| 149.123@23.748415    | 23.748415 | 150.1308  |         | 244208.53 | 244049.66  | 233944.06  | 254467.16 | 312568.56    | 277332.2     | 311965.3     | 276621.22    | 243919.3     | 269472.28    | 238925.98    | 254056.6     |
| 160.06111@11.61873   | 11.61873  | 161.06891 |         | 3715.3687 | 5087.4707  | 10556.032  | 1178.6782 | 73533.695    | 68456.79     | 65162.465    | 69389.34     | 2025.4734    | 3903.6367    | 1008.8966    | 1479.6774    |
| 174.16072@9.546037   | 9.546037  | 175.16852 |         | 310093.56 | 287314.03  | 320939.72  | 298898.9  | 231813.25    | 168103.03    | 249667.44    | 187595.1     | 149905.48    | 154272.38    | 164194.27    | 97926.73     |
| 174.20001@9.55398    | 9.55398   | 175.20781 |         | 78907.805 | 78058.945  | 85012.52   | 82271.57  | 64591.48     | 56884.734    | 66163.125    | 59481.137    | 47699.754    | 44432.824    | 53221.746    | 31472.877    |
| 179.17754@4.807038   | 4.807038  | 180.18534 |         | 317854.38 | 250755     | 250798.66  | 278514    | 174227.77    | 120056.67    | 50170.062    | 124096.67    | 79753.54     | 63689.957    | 31784.76     | 47662.848    |
| 179.21667@4.8303084  | 4.8303084 | 180.22447 |         | 45079.805 | 71675      | 73805.305  | 79605.06  | 55874.184    | 39783.438    | 31670.758    | 39467.887    | 20917.53     | 1908.0164    | 8310.682     | 15137.455    |
| 180.97272@12.878853  | 12.878853 | 181.98052 |         | 464561.53 | 555557.44  | 426256.75  | 360854.2  | 268142.53    | 328295.2     | 283432.28    | 360287       | 265884.56    | 290494.2     | 309381.88    | 289631.06    |
| 180.97284@14.119446  | 14.119446 | 181.98064 |         | 482018.4  | 453430.22  | 457862.3   | 393876.16 | 350410       | 381364.16    | 366535.25    | 380934       | 402733.7     | 345724.88    | 307403.94    | 360206.34    |
| 186.04501@2.9447353  | 2.9447353 | 187.05281 |         | 17139.61  | 26333.908  | 20328.041  | 23627.41  | 135873.75    | 116720.79    | 123258.35    | 132390.69    | 113594.46    | 125199.44    | 150383.64    | 137169.55    |
| 187.0416@2.9380963   | 2.9380963 | 188.0494  |         | 99315.14  | 166153.86  | 185301.33  | 161204.61 | 671659.2     | 767328.75    | 859056       | 685848.5     | 614607       | 775773.94    | 791456.56    | 724566.06    |
| 188.09216@2.352192   | 2.352192  | 189.09996 |         | 12486.648 | 4681.312   | 6697.1206  | 10193.783 | 68656.43     | 79925.23     | 53089.414    | 85331.04     | 57046.457    | 36481.137    | 15341.999    | 11762.918    |
| 190.07056@3.1925395  | 3.1925395 | 191.07836 |         | 91135.43  | 103089.305 | 87697.75   | 98562.875 | 504265       | 369939.9     | 265918.75    | 486819.28    | 249889.38    | 283199.34    | 466907.38    | 291911.03    |
| 202.107712@2.3899403 | 2.3899403 | 203.11551 |         | 20691.4   | 7896.0825  | 21376.307  | 6691.0273 | 197591.28    | 174122.84    | 156434.34    | 194273.55    | 137558.75    | 125957.234   | 52261.184    | 119379.45    |
| 219.10556@4.5696263  | 4.5696263 | 220.11336 |         | 193131.3  | 306901.72  | 218708.86  | 322793.2  | 214678       | 255559.8     | 122278.1     | 307217.16    | 82471.484    | 104097.14    | 129472.234   | 83535.44     |
| 221.01193@4.832413   | 4.832413  | 222.01973 |         | 1315161   | 1078914.5  | 1170669.8  | 629030.75 | 864355.4     | 766683.3     | 800769.6     | 822931.06    | 556712.9     | 471633.88    | 269182.6     | 248211.2     |
| 223.02716@3.5645676  | 3.5645676 | 224.03496 |         | 136362.33 | 95820.516  | 125695.695 | 197171.75 | 11142.473    | 10186.89     | 5156.6616    | 5110.6836    | 5428.485     | 9284.536     | 1841.561     | 683.707      |
| 225.06111@4.8618326  | 4.8618326 | 226.06891 |         | 6262649.5 | 5727697    | 5634680    | 6003855.5 | 4699123.5    | 3712766.2    | 3806593.2    | 3846932.5    | 2934816.5    | 2520511.2    | 2132584.8    | 2034998.1    |
| 225.197@4.871625     | 4.871625  | 226.2048  |         | 74360.36  | 57548.934  | 58140.996  | 59848.15  | 64731.99     | 49305.88     | 54370.715    | 45041.67     | 31603.2      | 14328.921    | 24365.361    | 21418.861    |
| 232.00981@14.834886  | 14.834886 | 233.01761 |         | 81271.23  | 110880.57  | 133268.4   | 8172.37   | 29473.389    | 53110.137    | 20776.797    | 10391.617    | 4474.099     | 11253.6      | 5844.729     |              |
| 236.09189@2.1470566  | 2.1470566 | 237.09969 |         | 10103.035 | 2360.7139  | 6435.6943  | 7079.8203 | 93693.57     | 104740.3     | 85770.99     | 121991       | 60407.406    | 80328.48     | 35190.73     | 57551.477    |
| 239.21689@4.7739596  | 4.7739596 | 240.22469 |         | 283624.38 | 229981.69  | 227627.94  | 255866.98 | 167387.25    | 43260.883    | 125317.64    | 47082.688    | 74534.22     | 59001.64     | 47155.05     | 47403.29     |
| 239.26306@4.786435   | 4.786435  | 240.27086 |         | 42593.992 | 75605.3    | 76026.266  | 83123.6   | 54795.16     | 38002.13     | 37575.125    | 41243.164    | 9714.089     | 23144.57     | 3054.1968    | 6388.7305    |
| 241.01132@5.7897344  | 5.7897344 | 242.01912 |         | 363062.6  | 242336.58  | 295011.12  | 266279    | 171134.06    | 65655.58     | 98559.766    | 67969.29     | 75802.43     | 30590.072    | 120244.15    | 11246.106    |
| 241.0369@3.54534     | 3.5453403 | 242.0447  |         | 146939.72 | 101623.53  | 120082.54  | 202229.06 | 42604.96     | 26000.918    | 32505.654    | 6797.1167    | 15677.782    | 13611.298    | 2931.6086    | 5379.9185    |
| 252.08844@2.3017325  | 2.3017325 | 253.09624 |         | 3086.79   | 1592.5511  | 1684.2839  | 4263.067  | 119281.02    | 85279.96     | 84783.586    | 80097.625    | 74726.03     | 81721.2      | 76245.375    | 53163.496    |
| 257.0773@5.6222796   | 5.6222796 | 258.0851  |         | 17840.146 | 10960.525  | 31249.375  | 10960.525 | 3984.214     | 74840.125    | 146396.9     | 53512.42     | 84101.875    | 72311.57     | 135286.31    | 38771.195    |
| 260.0588@6.769796    | 6.769796  | 261.0666  |         | 55043.023 | 43050.633  | 48211.44   | 38936.24  | 82355.54     | 57583.08     | 68232.58     | 56582.285    | 67722.28     | 68840.734    | 64959.957    | 58579.277    |
| 275.05325@2.9626772  | 2.9626772 | 276.06105 |         | 201321.83 | 333342.47  | 244644.03  | 374121.6  | 142154.1     | 200779.39    | 197000.83    | 196825.45    | 268105.1     | 372087.94    | 345419.97    | 350700.12    |
| 276.07486@2.8121698  | 2.8121698 | 277.08266 |         | 57248.19  | 78742.195  | 71435.82   | 62149.49  | 155120.58    | 174711.8     | 173628.42    | 190533.1     | 169401.84    | 167055.4     | 103484.695   | 197643.83    |
| 277.0706@2.8237498   | 2.8237498 | 278.0784  |         | 296612.5  | 368518.12  | 348123.5   | 315991.56 | 650595.75    | 717435.7     | 712825.9     | 826066.75    | 691550.44    | 685589.06    | 448094.4     | 842492.06    |
| 279.0591@5.89792     | 5.89792   | 280.0669  |         | 28491.928 | 26417.629  | 42986.39   | 27807.768 | 98613.09     | 114220.31    | 87213.26     | 72958.48     | 89561.15     | 74834.92     | 79786.195    | 90062.34     |
| 279.0882@3.115917    | 3.115917  | 280.096   |         | 344427.97 | 354979.84  | 349162.7   | 201993.75 | 676404.06    | 613660.56    | 775178       | 505879.34    | 673551.56    | 642711.6     | 566178.06    | 662359.4     |
| 283.11807@1.526591   | 1.5265914 | 284.12587 |         | 1526.8934 | 2397.801   | 2851.7942  | 9514.14   | 96226.75     | 19256.133    | 14363.082    | 12743.286    | 17329.713    | 29441.06     | 13359.855    | 19955.43     |
| 284.91522@12.675468  | 12.675468 | 285.92302 |         | 534.3179  | 2398.8057  | 1416.4226  | 459.46765 | 3203.7583    | 3874.0505    | 7870.1895    | 3062.6858    | 18213.84     | 6151.7007    | 51886.914    | 17074.816    |
| 285.07477@1.6001414  | 1.6001414 | 286.08257 |         | 2181.135  | 12097.206  | 20631.625  | 1140.9924 | 40519.355    | 59150.645    | 16890.863    | 39770.08     | 52859.125    | 39030.086    | 39862        | 49248.758    |
| 285.1162@3.4687908   | 3.4687908 | 286.124   |         | 34436.66  | 39670.402  | 42297.836  | 78750.84  | 20044.996    | 9107.471     | 4627.116     | 6744.252     | 19187.678    | 24577.102    | 7847.285     | 4316.6094    |
| 286.94736@8.590554   | 8.590554  | 287.95516 |         | 283432.38 | 212820.2   | 211258.94  | 200714.52 | 103244.625   | 75097.61     | 98363.55     | 141619.6     | 117544.35    | 107433.516   | 82140.234    | 105837.53    |
| 293.04947@4.8638577  | 4.8638577 | 294.05727 |         | 136146.36 | 206164.83  | 86172.336  | 215495.83 | 57984.86     | 97465.945    | 14398.495    | 146795.67    | 3612.7197    | 1556.2101    | 158.55548    | 1388.4454    |
| 293.0818@4.3396525   | 4.3396525 | 294.0896  |         | 4045.4177 | 15399.468  | 19921.545  | 112866.46 | 964.55426    | 5074.764     | 1245.1871    | 1880.9954    | 13249.0625   | 48139.75     | 39478.535    | 9364.482     |
| 294.88925@12.167702  | 12.167702 | 295.89705 |         | 6470.0205 | 10425.973  | 1811.9108  | 14079.683 | 50611.68     | 40040.906    | 39947.22     | 21258.654    | 70236.36     | 40841.7      | 46858        | 46035.156    |
| 296.87512@12.387673  | 12.387673 | 297.88292 |         | 34394.14  | 73405.75   | 35224.812  | 69603.49  | 90717.93     | 75720.29     | 86978.016    | 80135.19     | 94569.82     | 96984.98     | 88248.61     | 99439.91     |
| 297.0799@2.8554666   | 2.8554666 | 298.0877  |         | 2559.541  | 47679.703  | 60627.906  | 11657.92  | 134277.97    | 152029.58    | 118765.18    | 157702.97    | 140896.89    | 145277.94    | 83181.055    | 178732.69    |
| 298.98877@2.937507   | 2.937507  | 299.99657 |         | 5658.928  | 5700.609   | 4125.657   | 3520.4934 | 63278.043    | 70305.555    | 91481.44     | 103913.42    | 74402.89     | 72252.06     | 78301.914    | 66153.89     |
| 301.0064@3.5495532   | 3.5495532 | 302.0142  |         | 50861.94  | 48464.137  | 59296.094  | 115173.19 | 7912.4385    | 1007.51447   | 9740.502     | 3550.3215    | 11816.76     | 6212.1274    | 780.3208     | 281.7853     |
| 302.051@12.329162    | 12.329162 | 303.0588  |         | 223188.03 | 248113.56  | 231683.84  | 247348.9  | 259863.84    | 266309.94    | 260421.34    | 275260       | 166045.5     | 214618.3     | 176352.61    | 189754.72    |
| 302.0644@4.278878    | 4.2788777 | 303.0722  |         | 12250.911 | 32935.027  | 32997.164  | 35165.45  | 19523.871    | 10928.314    | 15948.139    | 10682.077    | 5001.1143    | 7769.372     | 3835.6682    | 7866.4575    |
| 302.10               |           |           |         |           |            |            |           |              |              |              |              |              |              |              |              |



| Compound Name       | RT        | Mass      | Formula | Ctrl_01    | Ctrl_02   | Ctrl_03    | Ctrl_04   | MPP+ 24hr_01 | MPP+ 24hr_02 | MPP+ 24hr_03 | MPP+ 24hr_04 | MPP+ 36hr_01 | MPP+ 36hr_02 | MPP+ 36hr_03 | MPP+ 36hr_04 |
|---------------------|-----------|-----------|---------|------------|-----------|------------|-----------|--------------|--------------|--------------|--------------|--------------|--------------|--------------|--------------|
| 332.0951@4.7153363  | 4.7153363 | 333.1029  |         | 274977.34  | 399616    | 282681.3   | 228253.98 | 131061.33    | 204595.17    | 178334.72    | 226939.8     | 49201.402    | 76144.78     | 81811.27     | 71430.086    |
| 334.88568@12.427764 | 12.427764 | 335.89348 |         | 13856.159  | 36439.46  | 25321.814  | 45080.06  | 71319.65     | 45484.684    | 59964.004    | 43128.234    | 60325.527    | 82666.53     | 106816.72    | 64866.82     |
| 339.1988@0.9208575  | 0.9208575 | 340.2066  |         | 262051.98  | 104123.7  | 187320.78  | 209796.2  | 82308.57     | 54446.773    | 111305.836   | 37248.23     | 653979.6     | 246715.95    | 300983.75    | 241647.03    |
| 347.14508@5.2234874 | 5.2234874 | 348.15288 |         | 24785.785  | 11308.341 | 9822.399   | 28425.025 | 20109.014    | 32479.547    | 55824.52     | 38933.125    | 10917.523    | 7789.398     | 3412.4739    | 12630.659    |
| 353.04794@0.9667501 | 0.9667501 | 354.05574 |         | 386441.94  | 708657.1  | 943937.7   | 772483    | 1228452.5    | 1237679.2    | 877197.6     | 1022053.56   | 1345852.4    | 1492704.2    | 1375586.5    | 1537270.4    |
| 357.1678@2.3088386  | 2.3088386 | 358.1756  |         | 1283689.2  | 1502185.8 | 1545945.4  | 1394603.2 | 770247.6     | 1258463      | 1456517.4    | 1992593.2    | 896341.94    | 661195.56    | 591465.5     | 827662.2     |
| 359.16547@2.3125074 | 2.3125074 | 360.17327 |         | 555272.1   | 624692    | 707366.3   | 629147.06 | 336539.2     | 716468.4     | 623034.7     | 703676.25    | 396412.28    | 289201.72    | 301462.78    | 353749.06    |
| 359.28937@4.844226  | 4.8442264 | 360.29717 |         | 39428.684  | 49582.727 | 50920.4    | 61340.246 | 24921.533    | 8739.697     | 14862.75     | 16128.913    | 2573.987     | 1069.4083    | 138.86655    | 332.07886    |
| 363.14877@3.7785633 | 3.7785633 | 364.15657 |         | 16766.244  | 8416.555  | 10397.993  | 51405.324 | 1573.054     | 2302.029     | 31091.73     | 3005.5835    | 1916.1415    | 905.0568     | 106.32394    | 844.22064    |
| 363.14932@4.2665257 | 4.2665257 | 364.15712 |         | 4427.7134  | 6275.3813 | 9023.641   | 9188.775  | 28846.15     | 46285.535    | 38584.348    | 37889.28     | 23423.238    | 38031.51     | 5308.1445    | 17463.992    |
| 365.15555@4.1830034 | 4.1830034 | 366.16335 |         | 217053.64  | 232181.11 | 236528.89  | 237430.23 | 62629.375    | 176066.1     | 237652.33    | 147718.42    | 81292.26     | 110661.984   | 78749.76     | 93782.02     |
| 366.10843@2.692629  | 2.692629  | 367.11623 |         | 21576.697  | 52294.082 | 30637.791  | 53807.25  | 12337.149    | 14196.009    | 12378.578    | 21209.152    | 2512.4277    | 11018.285    | 4752.2495    | 9320.393     |
| 368.91785@11.736878 | 11.736878 | 369.92565 |         | 51581.65   | 81342.445 | 46232.688  | 45606.33  | 135229.97    | 95314.38     | 102338.1     | 101948.22    | 57081.88     | 64252.332    | 74562.04     | 66877.1      |
| 368.9184@10.852309  | 10.852309 | 369.9262  |         | 39635.89   | 73999.02  | 33529.426  | 69940.39  | 154030.66    | 145474.4     | 129922.89    | 140063.92    | 112955.59    | 168994.77    | 178792.02    | 133226.34    |
| 373.0609@2.88944    | 2.8894403 | 374.0687  |         | 2606.414   | 18314.248 | 21981.395  | 31061.922 | 78575.85     | 139960.62    | 146583.42    | 209816.89    | 77193.164    | 50791.695    | 50600.934    | 100932.63    |
| 376.96664@4.8021092 | 4.8021092 | 377.97444 |         | 56373.727  | 9164.235  | 55473.188  | 41840.227 | 2840.2803    | 11924.485    | 17227.99     | 8876.04      | 1623.2882    | 2068.5515    | 1930.3658    | 700.15485    |
| 388.01233@11.82683  | 11.826829 | 389.02013 |         | 54003.707  | 46027.242 | 56644.754  | 36291.723 | 26325.26     | 8729.591     | 20924.14     | 9637.018     | 18031.955    | 9319.132     | 6592.008     | 1973.5638    |
| 388.1546@1.2126831  | 1.2126831 | 389.1624  |         | 620466.94  | 551579.1  | 520140.6   | 576642.9  | 910840.4     | 683714.9     | 726113.2     | 1044665.4    | 1241464.9    | 1100791.2    | 1496286.2    | 1143576.8    |
| 398.16534@4.819566  | 4.819566  | 399.17314 |         | 175140.61  | 183206.86 | 134135.25  | 304459.38 | 35803.695    | 57462.465    | 57735.65     | 65336.715    | 5660.3667    | 15900.322    | 5572.8076    | 8099.79      |
| 400.1801@4.2311444  | 4.2311444 | 401.1879  |         | 175065.58  | 80410.4   | 87420.25   | 322631.7  | 17411.625    | 30440.451    | 71158.3      | 20565.336    | 15358.076    | 42531.78     | 24470.258    | 11524.257    |
| 404.14795@1.202113  | 1.202113  | 405.15575 |         | 73084.65   | 54127.637 | 51533.74   | 61828.79  | 149491.17    | 104601.99    | 115992.55    | 151280.27    | 192862.1     | 171130.78    | 222049.7     | 120955.87    |
| 410.21985@1.002382  | 1.0023824 | 411.22765 |         | 124654.97  | 13742.56  | 5595.5737  | 362.48605 | 1            | 120.197876   | 14.28738     | 17.3678      | 109.38804    | 80.70621     | 6.6517763    | 80.4094      |
| 416.0966@11.389426  | 11.389426 | 417.1044  |         | 84351.945  | 92827.81  | 96051.96   | 104784.45 | 90042.39     | 72813.95     | 83140.56     | 74407.85     | 45583.016    | 40458.812    | 41407.22     | 41671.37     |
| 419.0858@4.8160663  | 4.8160663 | 420.0936  |         | 49547.184  | 40272.766 | 9455.145   | 32043.477 | 8545.782     | 3900.8647    | 9535.121     | 16695.121    | 4938.3135    | 1025.393     | 641.80945    | 228.02124    |
| 437.21283@4.304917  | 4.304917  | 438.22063 |         | 2010421.2  | 2617290.5 | 2384471.8  | 2986537.2 | 376375.38    | 1382174      | 1200197.1    | 1368581.8    | 432475.25    | 675952.9     | 402713.97    | 507718.9     |
| 438.8099@12.376152  | 12.376152 | 439.8177  |         | 11105.904  | 26527.277 | 20148.484  | 24174.61  | 45981.19     | 30342.062    | 42716.85     | 39496.27     | 33088.754    | 45040.887    | 44276.098    | 53067.67     |
| 445.18585@1.2730834 | 1.2730834 | 446.19365 |         | 468723.06  | 467540.22 | 464917.53  | 469446.47 | 423549.03    | 416242.53    | 423260.25    | 410304.34    | 437594.12    | 449593.6     | 471221.84    |              |
| 445.1935@4.347508   | 4.3475075 | 446.2013  |         | 55439.234  | 60455.13  | 73626.43   | 59340.227 | 692.2607     | 14381.512    | 18494.283    | 2036.7146    | 8300.657     | 4389.332     | 15086.953    | 1584.8909    |
| 450.23355@5.431273  | 5.431273  | 451.24135 |         | 127555.23  | 141506.84 | 199622.89  | 143079.62 | 323302.8     | 300167.5     | 208486.25    | 250721.28    | 302564.38    | 255969.23    | 285649.8     | 233103.86    |
| 451.2357@5.4706874  | 5.4706874 | 452.2435  |         | 23713.045  | 30613.361 | 36147.965  | 31022.652 | 60183.5      | 82888.18     | 67609.18     | 73095.34     | 77183.3      | 30775.934    | 50931.613    | 64505.902    |
| 456.0444@2.7886012  | 2.7886012 | 457.0525  |         | 78220.94   | 108586.46 | 126061.195 | 129140.76 | 160704.45    | 167666.97    | 123832.805   | 120202.766   | 156880.19    | 197555.36    | 171391.27    | 204106.6     |
| 456.13745@2.8181832 | 2.8181832 | 457.14525 |         | 8899.136   | 14076.401 | 7770.727   | 11434.269 | 31321.701    | 37967.508    | 18959.703    | 32201.387    | 52225.836    | 35172.14     | 26517.254    | 44277.242    |
| 457.1361@2.8116906  | 2.8116906 | 458.1439  |         | 67941.805  | 91741.61  | 105199.74  | 72203.48  | 223341.27    | 239699.27    | 226335.88    | 265872.2     | 232474.56    | 218475.48    | 131261.28    | 243240.44    |
| 459.1902@4.2843447  | 4.2843447 | 460.198   |         | 41634.492  | 48079.91  | 60450.117  | 81226.84  | 1578.0024    | 37769.156    | 21304.23     | 36094.8      | 1755.7892    | 3700.2686    | 1197.7361    | 2680.333     |
| 463.28143@1.33525   | 1.33525   | 464.28923 |         | 513348.53  | 380517.06 | 544903.6   | 651724.25 | 625624.75    | 465335       | 547801.9     | 539103.7     | 880276.5     | 752116.6     | 739326.06    | 1089739.5    |
| 463.32605@4.8408036 | 4.8408036 | 464.33385 |         | 106404.37  | 146386.2  | 147062.7   | 93746.64  | 49050.824    | 58300.37     | 94850.414    | 57181.652    | 32434.75     | 25955.904    | 13638.225    | 18085.324    |
| 465.3414@3.520032   | 3.520032  | 466.3492  |         | 37765.44   | 28212.219 | 39780.51   | 65272.918 | 12151.507    | 3346.352     | 8145.9834    | 22268.842    | 7252.6543    | 5218.953     | 4659.9062    |              |
| 468.12802@2.176746  | 2.176746  | 469.13582 |         | 1.11E+07   | 1.43E+07  | 1.85E+07   | 1.56E+07  | 1.87E+07     | 2.00E+07     | 1.60E+07     | 1.71E+07     | 2.25E+07     | 2.32E+07     | 1.87E+07     | 2.43E+07     |
| 468.31998@2.17741   | 2.17741   | 469.32778 |         | 309618.66  | 423314.25 | 590894.4   | 472400.03 | 641394.25    | 672603.7     | 514489.47    | 571616.25    | 759381.6     | 799751.7     | 637852.5     | 866692.7     |
| 468.39307@2.1770759 | 2.1770759 | 469.40087 |         | 109132.164 | 143448.27 | 209330.47  | 167741.06 | 217279.34    | 208974.2     | 171968.89    | 176825.61    | 260683.33    | 269562.88    | 230777.19    | 280522.97    |
| 469.98157@11.823563 | 11.823563 | 470.98937 |         | 75977.73   | 62934.023 | 63654.09   | 58283.75  | 20604.082    | 3989.9163    | 15041.678    | 2812.6594    | 9143.358     | 9129.368     | 11872.834    | 2988.4956    |
| 480.9519@14.040954  | 14.040954 | 481.9597  |         | 5964.16    | 33556.76  | 15941.198  | 30465.13  | 106126.9     | 47666.6      | 44814.332    | 27851.67     | 87323.96     | 121569.72    | 241703.64    | 94588.8      |
| 489.27448@0.897692  | 0.897692  | 490.28228 |         | 270522.62  | 173402.78 | 220390.98  | 221090.8  | 38900.805    | 37895.92     | 35789.184    | 41137.668    | 33706.13     | 28186.885    | 36583.8      | 39652.9      |
| 490.2952@1.9584527  | 1.9584527 | 491.303   |         | 93068.2    | 12606.798 | 5862.106   | 1608.7759 | 80.64749     | 85.47648     | 1            | 595.8856     | 1            | 67.88943     | 1            | 1            |
| 502.28458@6.8138223 | 6.8138223 | 503.29238 |         | 2787.9973  | 17487.742 | 3879.1802  | 16847.217 | 5523.6523    | 9984.574     | 17584.547    | 14892.539    | 41295.973    | 50946.953    | 64093.473    | 28168.447    |
| 526.87506@12.949448 | 12.949448 | 527.88286 |         | 607.90564  | 3917.6067 | 3428.4355  | 826.0315  | 5658.5938    | 5213.7466    | 7650.3286    | 3026.2893    | 20832.188    | 24240.164    | 43165.59     | 23744.6      |
| 533.1044@15.82401   | 15.82401  | 534.1122  |         | 2047.4991  | 1188.6613 | 1740.9573  | 1035.7941 | 25356.29     | 21468.328    | 15863.707    | 12667.011    | 59108.5      | 64574.96     | 56852.47     | 62360.64     |
| 579.0262@8.62867    | 8.62867   | 580.034   |         | 40973.293  | 48673.06  | 41026.184  | 43607.805 | 4800.3735    | 7796.6865    | 7305.0493    | 6106.502     | 1489.1572    | 12947.831    | 1000.3717    | 12095.786    |
| 587.0288@7.4247108  | 7.4247108 | 588.0366  |         | 122111.836 | 168650.56 | 134125.8   | 150037.4  | 21711.254    | 6257.6733    | 7907.9487    | 4833.6626    | 2027.4298    | 2543.0103    | 3131.4617    | 2799.5837    |
| 599.3189@3.332655   | 3.332655  | 600.3267  |         | 153102.11  | 157386.48 | 154350.05  | 86167.58  | 49575.46     | 86941.914    | 85207.34     | 60172.285    | 127452.25    | 118531.9     | 154841.56    | 186909.56    |
| 616.8468@13.165038  | 13.165038 | 617.8546  |         | 3061.9001  | 1745.8132 | 2405.1797  | 2164.6965 | 19933.783    | 9093.964     | 6047.01      | 4052.1328    | 29348.65     | 23263.545    | 33595.797    | 4916.9683    |
| 621.30316@2.7867737 | 2.7867737 | 622.31096 |         | 80380.05   | 75270.69  | 102509.46  | 74398.4   | 43589.082    | 22897.184    | 34275.688    | 32825.426    | 42686.72     | 23833.785    | 50067.14     | 37622.89     |
| 628.0552@7.634414   | 7.634414  | 629.063   |         | 253136.06  | 310481.44 | 165774.17  | 310040.7  | 133771.47    | 128932.28    | 163002.61    | 154920.27    | 153723.98    | 180346       | 146366.58    | 208988.67    |
| 662.101@11.485171   | 11.485171 | 663.1088  |         | 114662.76  | 143553.83 | 136200.44  | 155045.23 | 87509.12     | 89438.6      | 98906.4      | 79745.97     | 73924.36     | 93564.65     | 99714.38     | 87480.21     |
| 664.11646@8.408097  | 8.408097  | 665.12426 |         | 20259.166  | 46008.15  |            |           |              |              |              |              |              |              |              |              |

| Cluster 1         |              |              |              |              |
|-------------------|--------------|--------------|--------------|--------------|
| gene names        | probe names  | fold change  |              |              |
|                   |              | contr.vs.24h | contr.vs.36h | contr.vs.48h |
| SH3KBP1           | 1553588_at   | 0.473033665  | 0.399529518  | 0.332807137  |
| FAM13C            | 1554547_at   | 0.695214731  | 0.551365121  | 0.323110302  |
| HNRPL             | 1554678_s_at | 0.579149391  | 0.481436159  | 0.476937477  |
| HNRNPM            | 1555844_s_at | 0.488307322  | 0.429921419  | 0.373884252  |
| LHX9              | 1562736_at   | 0.483039711  | 0.382685784  | 0.299411499  |
| ---               | 1562828_at   | 0.324111554  | 0.348398624  | 0.436055181  |
| ---               | 1568870_at   | 0.585616213  | 0.499196755  | 0.53870281   |
| HNRNPM            | 200072_s_at  | 0.514911362  | 0.460679241  | 0.409534279  |
| HSP90B1           | 200599_s_at  | 0.483362822  | 0.541489576  | 0.526377313  |
| TXNIP             | 201008_s_at  | 0.299843815  | 0.362984704  | 0.335365829  |
| TXNIP             | 201009_s_at  | 0.384895558  | 0.435930002  | 0.41640731   |
| TXNIP             | 201010_s_at  | 0.242071405  | 0.313960284  | 0.277968869  |
| BCLAF1            | 201083_s_at  | 0.581288973  | 0.550997903  | 0.393188384  |
| BCLAF1            | 201084_s_at  | 0.645139872  | 0.599509735  | 0.427714471  |
| BCLAF1            | 201101_s_at  | 0.621403017  | 0.650869473  | 0.462545346  |
| PCNA              | 201202_at    | 0.601883261  | 0.567893042  | 0.426101196  |
| TOP2A             | 201291_s_at  | 0.686670648  | 0.454984788  | 0.221560957  |
| TOP2A             | 201292_at    | 0.682922303  | 0.436800986  | 0.1871374    |
| SFPQ              | 201585_s_at  | 0.506138745  | 0.481193542  | 0.365800986  |
| SFPQ              | 201586_s_at  | 0.461954013  | 0.447370733  | 0.388176833  |
| SMC4              | 201663_s_at  | 0.77003523   | 0.609143705  | 0.443977288  |
| SMC4              | 201664_at    | 0.678107589  | 0.575994773  | 0.415818999  |
| ALCAM             | 201951_at    | 0.720179032  | 0.588583166  | 0.491532098  |
| KIAA0101          | 202503_s_at  | 0.555640128  | 0.42623418   | 0.252814424  |
| DHFR              | 202534_x_at  | 0.681619258  | 0.566306867  | 0.412241445  |
| TYMS              | 202589_at    | 0.600165738  | 0.443126693  | 0.287167001  |
| HIST2H2BE         | 202708_s_at  | 0.538687169  | 0.399914781  | 0.302078911  |
| SFRS3             | 202899_s_at  | 0.483231021  | 0.536273619  | 0.445809206  |
| NBN               | 202905_x_at  | 0.631942649  | 0.600319562  | 0.461663461  |
| NBN               | 202907_s_at  | 0.653753443  | 0.62808253   | 0.476791136  |
| UBE2C             | 202954_at    | 0.745322894  | 0.585577101  | 0.377050183  |
| LMNB1             | 203276_at    | 0.782333349  | 0.632697831  | 0.405110219  |
| UGDH              | 203343_at    | 0.736406831  | 0.639961968  | 0.47799878   |
| MAD2L1            | 203362_s_at  | 0.536406024  | 0.404189053  | 0.283717978  |
| NELL2             | 203413_at    | 0.788671378  | 0.510749113  | 0.33893854   |
| APC               | 203527_s_at  | 0.604812734  | 0.649887808  | 0.455057456  |
| ZWINT             | 204026_s_at  | 0.541022563  | 0.403401155  | 0.283245675  |
| PROM1             | 204034_s_at  | 0.612168002  | 0.607704427  | 0.413166577  |
| FLRT2             | 204359_at    | 0.699883791  | 0.443562216  | 0.276090521  |
| LMO3              | 204424_s_at  | 0.387554017  | 0.270160423  | 0.158824346  |
| FZD1              | 204451_at    | 1.010496041  | 0.67832869   | 0.452706443  |
| VCAN              | 204619_s_at  | 0.695888644  | 0.508868702  | 0.430648228  |
| TRA2A             | 204658_at    | 0.527247965  | 0.524343523  | 0.421071767  |
| FEN1              | 204767_s_at  | 0.648408134  | 0.593528036  | 0.476397588  |
| ING3              | 205070_at    | 0.603359943  | 0.636410402  | 0.497642394  |
| NEFM              | 205113_at    | 0.797207264  | 0.581880653  | 0.498095552  |
| GRIA2             | 205358_at    | 0.451457801  | 0.431339274  | 0.50469152   |
| H2AFX             | 205436_s_at  | 0.81305098   | 0.614202585  | 0.46963401   |
| BAI3              | 205638_at    | 0.627706357  | 0.600684863  | 0.482628783  |
| PCDH17            | 205656_at    | 0.712372249  | 0.52571717   | 0.429766693  |
| NOVA1             | 205794_s_at  | 0.668051957  | 0.542902433  | 0.448027208  |
| JAKMIP2           | 205889_s_at  | 0.598382862  | 0.550396592  | 0.45884223   |
| ELAVL4            | 206051_at    | 0.720719622  | 0.580165368  | 0.408930079  |
| FUSIP1            | 206095_s_at  | 0.659703395  | 0.670626755  | 0.495723364  |
| ISL1              | 206104_at    | 0.58762626   | 0.473950442  | 0.375633895  |
| SFRS6             | 206108_s_at  | 0.606542053  | 0.549734211  | 0.484996556  |
| MEOX2             | 206201_s_at  | 0.511008349  | 0.369194035  | 0.261076424  |
| CENPF             | 207828_s_at  | 0.690202863  | 0.567690219  | 0.352223789  |
| HMG2              | 208025_s_at  | 0.682116056  | 0.561972084  | 0.413324987  |
| RBM3              | 208319_s_at  | 0.48030032   | 0.411058593  | 0.395059623  |
| SFRS3             | 208672_s_at  | 0.549878976  | 0.583869195  | 0.496462136  |
| SFRS3             | 208673_s_at  | 0.437624037  | 0.463529078  | 0.387152089  |
| G3BP2             | 208840_s_at  | 0.583132085  | 0.614409403  | 0.482315136  |
| DUSP6             | 208891_at    | 0.764583356  | 0.566762106  | 0.386038227  |
| DUSP6             | 208892_s_at  | 0.675150889  | 0.491360662  | 0.326355237  |
| ID4               | 209291_at    | 0.756658174  | 0.591531799  | 0.371152742  |
| ID4               | 209292_at    | 0.606883838  | 0.480151075  | 0.295200822  |
| HMMR              | 209709_s_at  | 0.679888355  | 0.577218228  | 0.407052576  |
| HIST1H2BK         | 209806_at    | 0.641447032  | 0.654323081  | 0.440234817  |
| LRRN3             | 209840_s_at  | 0.329212697  | 0.32410573   | 0.236899159  |
| LRRN3             | 209841_s_at  | 0.333674352  | 0.327665922  | 0.238106112  |
| SCN3A             | 210432_s_at  | 0.494458941  | 0.534241485  | 0.495817014  |
| VCAN              | 211571_s_at  | 0.679707269  | 0.579776534  | 0.494654403  |
| KCTD12            | 212192_at    | 0.735910816  | 0.548705787  | 0.437684433  |
| PDCD4             | 212594_at    | 0.655866721  | 0.483219894  | 0.403694     |
| SFRS12            | 212721_at    | 0.715526976  | 0.692726392  | 0.46103893   |
| TCF7L2            | 212761_at    | 0.763326922  | 0.436781738  | 0.360369173  |
| TCF7L2            | 212762_s_at  | 0.635858286  | 0.38217625   | 0.330285562  |
| FUBP1             | 212847_at    | 0.457805122  | 0.489340986  | 0.544371308  |
| CHN2              | 213385_at    | 0.823414152  | 0.532829014  | 0.377729135  |
| PENK              | 213791_at    | 0.374505837  | 0.277450604  | 0.214569594  |
| DCBLD2            | 213865_at    | 0.811768812  | 0.654282605  | 0.449727372  |
| SST               | 213921_at    | 0.743806485  | 0.560957718  | 0.466812689  |
| CDC42             | 214230_at    | 0.70171167   | 0.627605561  | 0.446682304  |
| HIST2H2AA3 /// HI | 214290_s_at  | 0.63403114   | 0.566394935  | 0.489088923  |
| BCLAF1            | 214499_s_at  | 0.630311738  | 0.595977742  | 0.451730848  |
| KLHL4             | 214591_at    | 0.454998573  | 0.471597775  | 0.399358379  |
| CCNB1             | 214710_s_at  | 0.594610288  | 0.474876471  | 0.246977218  |

| Cluster 2       |              |              |              |              |
|-----------------|--------------|--------------|--------------|--------------|
| gene names      | probe names  | fold change  |              |              |
|                 |              | contr.vs.24h | contr.vs.36h | contr.vs.48h |
| CBS             | 1553972_a_at | 2.051122153  | 1.771253477  | 1.538107153  |
| LOC401074       | 1559827_at   | 1.789910935  | 2.18236887   | 1.875766261  |
| ---             | 1569372_at   | 2.117878501  | 2.549910115  | 2.016759209  |
| WARS            | 200629_at    | 1.987739166  | 2.496299375  | 2.385250572  |
| XBP1            | 200670_at    | 2.053507787  | 2.170385269  | 1.639377339  |
| LITAF           | 200704_at    | 1.925989717  | 1.977528406  | 2.000688026  |
| SARS            | 200802_at    | 1.890359024  | 2.101273744  | 1.871820731  |
| SLC3A2          | 200924_s_at  | 2.983737054  | 3.021598753  | 2.659143002  |
| AARS            | 201000_at    | 2.057841905  | 1.98158049   | 1.821113828  |
| HAX1            | 201145_at    | 1.744467033  | 2.063385256  | 1.744027685  |
| CSDA            | 201160_s_at  | 2.261869121  | 2.097966676  | 1.707066627  |
| SLC7A5          | 201195_s_at  | 5.026104283  | 4.162306672  | 3.792081901  |
| CREG1           | 201200_at    | 1.798172294  | 2.082656773  | 1.654279492  |
| PHGDH           | 201397_at    | 2.824971429  | 2.699107055  | 2.219580568  |
| NQO1            | 201467_s_at  | 3.584438934  | 4.710812806  | 3.259678247  |
| NQO1            | 201468_s_at  | 3.208271551  | 3.347967133  | 2.385286115  |
| IRAK1           | 201587_s_at  | 2.321210605  | 2.257982869  | 2.455096464  |
| IFITM1          | 201601_x_at  | 1.628437149  | 2.248205881  | 2.211398448  |
| CALD1           | 201616_s_at  | 1.836596079  | 2.068665455  | 2.100494312  |
| MTXFD2          | 201761_at    | 2.529731984  | 2.409786884  | 2.08741749   |
| CD55            | 201925_s_at  | 2.256917012  | 2.337279564  | 2.101487464  |
| HEXB            | 201944_at    | 1.936886976  | 2.235770367  | 2.003720125  |
| CTSL1           | 202087_s_at  | 1.984648867  | 2.339983407  | 2.205957772  |
| TSPO            | 202096_s_at  | 1.543728151  | 2.079135705  | 2.568772273  |
| IFRD1           | 202146_at    | 2.10362544   | 2.052451455  | 1.649653825  |
| IFRD1           | 202147_s_at  | 2.184406004  | 2.355613912  | 1.839085057  |
| CDKN1A          | 202284_s_at  | 2.33150898   | 2.646056639  | 2.420999935  |
| ADAM9           | 202381_at    | 1.893118237  | 2.017394466  | 1.645361315  |
| CARS            | 202402_s_at  | 1.934349525  | 2.239381134  | 2.045802118  |
| DDIT4           | 202887_s_at  | 4.281728551  | 4.786414643  | 4.180953406  |
| ITGB1BP1        | 203336_s_at  | 1.63733569   | 2.015274624  | 2.004697785  |
| DUSP14          | 203367_at    | 2.080496489  | 2.17256158   | 1.658961189  |
| MPST            | 203524_s_at  | 2.01109648   | 1.831345937  | 1.689982865  |
| LOXL1           | 203570_at    | 2.512610391  | 2.418727797  | 2.434258734  |
| RAB4A           | 203582_s_at  | 2.037847921  | 1.960905855  | 1.622628747  |
| R3HDM2          | 203831_at    | 2.032631611  | 1.534512846  | 1.476029918  |
| ARG2            | 203946_s_at  | 1.838824806  | 2.563210104  | 2.107255059  |
| FZD6            | 203987_at    | 1.701558476  | 2.219483949  | 2.15939283   |
| ME1             | 204059_s_at  | 2.033421684  | 2.411334168  | 2.129366188  |
| PMAIP1          | 204285_s_at  | 3.498209172  | 3.690495702  | 2.656490513  |
| TRAF5           | 204352_at    | 2.133773379  | 2.617458437  | 3.388844938  |
| RIMS3           | 204730_at    | 2.373870908  | 1.916326573  | 1.746213449  |
| IARS            | 204744_s_at  | 1.916241689  | 2.083162877  | 1.852676468  |
| ATF5            | 204998_s_at  | 9.493873914  | 8.973255931  | 8.112907646  |
| ASNS            | 205047_s_at  | 3.321250372  | 3.405544116  | 2.784236981  |
| PSPH            | 205194_at    | 3.837081267  | 3.13085835   | 2.447122497  |
| PPP1R1A         | 205478_at    | 2.608852438  | 2.81386795   | 2.854210336  |
| ALAS1           | 205633_s_at  | 2.378578875  | 2.213623705  | 1.952347582  |
| FABP3           | 205738_s_at  | 2.213603564  | 3.091602885  | 3.131682804  |
| CLGN            | 205830_at    | 1.642580852  | 2.182036262  | 2.056803546  |
| ASS1            | 207076_s_at  | 4.522155446  | 5.204565444  | 4.469892517  |
| GARS            | 208693_s_at  | 2.375480056  | 2.450240552  | 2.173325568  |
| TSC2D3          | 208763_s_at  | 2.817102262  | 3.167560203  | 2.701538022  |
| H1FO            | 208886_at    | 2.323084332  | 2.227422167  | 2.199502298  |
| STX3            | 209238_at    | 1.839855667  | 2.204640998  | 2.447879218  |
| TNFRSF10B       | 209295_at    | 2.360923277  | 2.135245604  | 2.132038576  |
| RGS16           | 209324_s_at  | 2.110954244  | 2.328496061  | 2.008733308  |
| DDIT3 /// NR1H3 | 209383_at    | 3.18269705   | 3.805902665  | 3.378010017  |
| GRB10           | 209409_at    | 2.263610569  | 1.748325445  | 1.492927338  |
| DLK1            | 209560_s_at  | 2.176430594  | 1.671594299  | 1.481819531  |
| PDLIM3          | 209621_s_at  | 1.674876803  | 2.048811288  | 2.117025471  |
| SILV            | 209848_s_at  | 1.588377348  | 2.122763398  | 2.197475916  |
| VEGFA           | 210512_s_at  | 4.59824937   | 4.905367026  | 5.863234792  |
| NQO1            | 210519_s_at  | 3.117448304  | 4.1121357    | 2.916898173  |
| GYG1            | 211275_s_at  | 1.875435741  | 2.070658375  | 1.673718371  |
| SERPINB6        | 211474_s_at  | 1.779190727  | 2.303198342  | 2.091300522  |
| LRIG1           | 211596_s_at  | 1.857158184  | 1.647927469  | 2.002575935  |
| PTPRO           | 211600_at    | 2.109947753  | 2.408449294  | 2.256787461  |
| NR3C1           | 211671_s_at  | 1.807734271  | 2.071932746  | 2.029755476  |
| MTA1            | 211783_s_at  | 2.315331494  | 1.747545746  | 1.600097909  |
| YARS            | 212048_s_at  | 2.330068327  | 2.078056303  | 1.83774207   |
| SLC39A14        | 212110_at    | 2.110239456  | 1.984113278  | 1.762270202  |
| XPOT            | 212160_at    | 2.212211054  | 2.30443419   | 1.887969833  |
| SLC7A1          | 212290_at    | 2.193749813  | 1.863939414  | 1.770222439  |
| SLC7A1          | 212295_s_at  | 3.047300232  | 3.30895921   | 2.062491631  |
| C22orf9         | 212          |              |              |              |



| Cluster 1        |             |              |              |              |
|------------------|-------------|--------------|--------------|--------------|
| gene names       | probe names | fold change  |              |              |
|                  |             | contr.vs.24h | contr.vs.36h | contr.vs.48h |
| HIST1H2AC        | 215071_s_at | 0.756513434  | 0.678025393  | 0.358787358  |
| DCLK1            | 215303_at   | 0.598982105  | 0.472436591  | 0.4128495    |
| VCAN             | 215646_s_at | 0.660183214  | 0.503680583  | 0.423990983  |
| ATP2B1           | 215716_s_at | 0.555739892  | 0.537464229  | 0.479223549  |
| ZNF804A          | 215767_at   | 0.571494697  | 0.472355796  | 0.315357643  |
| TCF7L2           | 216035_x_at | 0.838092799  | 0.505389339  | 0.404973131  |
| TCF7L2           | 216037_x_at | 0.797890652  | 0.47725419   | 0.394015899  |
| HNRNP1A1 /// HNR | 216497_at   | 0.503132321  | 0.42912462   | 0.447399166  |
| TCF7L2           | 216511_s_at | 0.85924699   | 0.483633623  | 0.389846447  |
| SYNCRIP          | 217834_s_at | 0.8688189    | 0.856189212  | 0.492202456  |
| KBTBD4 /// PTPMT | 218570_at   | 0.693381254  | 0.659698732  | 0.471218927  |
| LHFP             | 218656_s_at | 0.875197326  | 0.631235406  | 0.454058107  |
| NCAPG            | 218662_s_at | 0.732772701  | 0.669850485  | 0.420371688  |
| MLF1IP           | 218883_s_at | 0.523495658  | 0.41836744   | 0.278734628  |
| ZBTB10           | 219312_s_at | 0.848297987  | 0.669424634  | 0.454060043  |
| FXJ1             | 219522_at   | 0.806230664  | 0.603980779  | 0.452443495  |
| 1-Mar            | 219574_at   | 0.521774846  | 0.484077197  | 0.367923081  |
| RP11-35N6.1      | 219732_at   | 0.730486165  | 0.562526886  | 0.320433589  |
| PCDH9            | 219737_s_at | 0.48001114   | 0.557430005  | 0.574673322  |
| CDH10            | 220115_s_at | 0.57055854   | 0.621602116  | 0.428971839  |
| BNC2             | 220272_at   | 0.724579221  | 0.562245532  | 0.480012439  |
| ARPP-21          | 220359_s_at | 0.591441764  | 0.596176069  | 0.449758899  |
| LBH              | 221011_s_at | 0.734383466  | 0.638176495  | 0.48449978   |
| FAM64A           | 221591_s_at | 0.706576331  | 0.564674576  | 0.467348957  |
| CSorf30          | 221823_at   | 0.696656295  | 0.599403724  | 0.46809268   |
| GPR177           | 221958_s_at | 0.62534712   | 0.441056374  | 0.348071852  |
| MCM4             | 222036_s_at | 0.685690884  | 0.532058789  | 0.401514353  |
| ---              | 222344_at   | 0.583125724  | 0.533339998  | 0.488996756  |
| CLPTM1L          | 223020_at   | 0.790119526  | 0.6275596    | 0.480391746  |
| ANKRD32          | 223542_at   | 0.644781351  | 0.555899759  | 0.448953684  |
| TMEFF2           | 223557_s_at | 0.798316232  | 0.496800113  | 0.303536527  |
| MMP16            | 223614_at   | 0.474409598  | 0.461791704  | 0.378962684  |
| DCBLD2           | 224911_s_at | 0.775723596  | 0.592657748  | 0.408273158  |
| FRMD4A           | 225163_at   | 0.752521039  | 0.535509921  | 0.470658868  |
| EDIL3            | 225275_at   | 0.702675972  | 0.607634235  | 0.468487818  |
| ETNK1            | 225290_at   | 0.45625338   | 0.465250635  | 0.437614169  |
| FUSIP1           | 225348_at   | 0.559543052  | 0.605536601  | 0.370375812  |
| PHF17            | 225816_at   | 0.771256199  | 0.587308006  | 0.415407265  |
| PHF17            | 225820_at   | 0.713101027  | 0.586876921  | 0.412728443  |
| DNER             | 226281_at   | 1.050913648  | 0.644581552  | 0.468580916  |
| C3orf58          | 226464_at   | 0.711312891  | 0.56253225   | 0.400809344  |
| PANK1            | 226649_at   | 0.803984804  | 0.646549333  | 0.414809739  |
| C6orf173         | 226936_at   | 0.56328315   | 0.577263681  | 0.440491681  |
| SGEF             | 227197_at   | 0.569475849  | 0.412209059  | 0.402372018  |
| PCDH17           | 227289_at   | 0.692681181  | 0.468576821  | 0.335583399  |
| ---              | 228045_at   | 0.685465143  | 0.588511075  | 0.476934426  |
| PRKG1            | 228396_at   | 0.751667048  | 0.684577481  | 0.498084605  |
| PPP1R1C          | 228646_at   | 0.66552989   | 0.666969823  | 0.457000556  |
| PCDH17           | 228863_at   | 0.693390145  | 0.463029798  | 0.325914486  |
| GPR177           | 228950_s_at | 0.651944239  | 0.481940098  | 0.344080845  |
| ---              | 229072_at   | 0.632778499  | 0.633855676  | 0.476132303  |
| TMEM178          | 229302_at   | 0.571881733  | 0.437293504  | 0.40123013   |
| ---              | 229383_at   | 0.638526422  | 0.54579434   | 0.425435891  |
| FBXW7            | 229419_at   | 0.625863628  | 0.593412466  | 0.466336896  |
| LOC285178        | 230057_at   | 0.445835877  | 0.488810587  | 0.468352471  |
| ---              | 230175_s_at | 0.83730906   | 0.606496268  | 0.413541485  |
| TRIM13           | 230192_at   | 0.55659937   | 0.576161908  | 0.464234245  |
| BNC2             | 230722_at   | 0.345517117  | 0.330193655  | 0.298657645  |
| ---              | 231037_at   | 0.606967146  | 0.481918561  | 0.466033645  |
| UNC5D            | 231325_at   | 0.658362737  | 0.44403638   | 0.389778884  |
| ASXL3            | 233536_at   | 0.735929986  | 0.583507692  | 0.489344283  |
| ---              | 235018_at   | 0.522066392  | 0.609196233  | 0.461894977  |
| ---              | 235201_at   | 0.451755561  | 0.52646229   | 0.469001637  |
| ---              | 235355_at   | 0.551035659  | 0.578668321  | 0.492838394  |
| ---              | 235456_at   | 0.938272635  | 0.656887591  | 0.424879392  |
| ---              | 235494_at   | 0.509512061  | 0.438355307  | 0.507397092  |
| VSTM2A           | 236308_at   | 0.68483421   | 0.70314294   | 0.494569136  |
| GRIA2            | 236538_at   | 0.405392825  | 0.35561862   | 0.428090255  |
| ELAVL4           | 238073_at   | 0.705373173  | 0.541901356  | 0.360878672  |
| ---              | 238155_at   | 0.61918776   | 0.577062977  | 0.487582621  |
| LOC100288418 /// | 238199_x_at | 0.379780278  | 0.337764919  | 0.343129145  |
| BNC2             | 238478_at   | 0.379278993  | 0.324150492  | 0.320009482  |
| MTHFD2L          | 238762_at   | 0.579871803  | 0.615820851  | 0.468636314  |
| B3GAT2           | 239144_at   | 0.506094144  | 0.48628306   | 0.401095873  |
| ZNF708           | 239482_x_at | 0.529243134  | 0.592846893  | 0.435021134  |
| POU3F2           | 242455_at   | 0.640262465  | 0.512835664  | 0.390435405  |
| ---              | 242845_at   | 0.60134294   | 0.477777351  | 0.407457588  |
| ---              | 243278_at   | 0.454170312  | 0.513144315  | 0.392477143  |
| ---              | 244295_at   | 0.450335753  | 0.558851433  | 0.597808022  |
| DHFR             | 48808_at    | 0.709310539  | 0.58982976   | 0.45104406   |

| Cluster 2                 |             |              |              |              |
|---------------------------|-------------|--------------|--------------|--------------|
| gene names                | probe names | fold change  |              |              |
|                           |             | contr.vs.24h | contr.vs.36h | contr.vs.48h |
| ATP6VOE1                  | 214149_s_at | 1.850895037  | 2.187835765  | 1.665453112  |
| GAL                       | 214240_at   | 2.101057092  | 2.193868826  | 2.113806957  |
| DKK3                      | 214247_s_at | 2.449898753  | 2.323361123  | 2.062485984  |
| SHMT2                     | 214437_s_at | 4.321115449  | 4.163757509  | 3.756232569  |
| RHOQ                      | 214449_s_at | 2.358224817  | 1.927642631  | 1.585992478  |
| BCAT1                     | 214452_at   | 1.980323053  | 2.156769889  | 1.494981685  |
| NHLH1                     | 214628_at   | 3.39958852   | 3.016840914  | 2.867349552  |
| SLC38A6                   | 214830_at   | 1.44411401   | 2.244644354  | 2.066007235  |
| FAM149A                   | 214889_at   | 2.108367336  | 2.087841295  | 1.902734666  |
| NR3C1                     | 216321_s_at | 2.391727169  | 2.624165362  | 2.255477156  |
| MTCP1NB                   | 216862_s_at | 1.910169599  | 2.225562199  | 1.858040335  |
| CTH                       | 217127_at   | 2.759988979  | 2.926972774  | 2.071187567  |
| HERPUD1                   | 217168_s_at | 2.920024792  | 3.299674443  | 3.083200371  |
| S100A6                    | 217728_at   | 1.766131835  | 2.292687861  | 2.559221639  |
| GATAD2A                   | 218131_s_at | 2.105346891  | 1.68444975   | 1.460154446  |
| CCDC92                    | 218175_at   | 2.271859572  | 1.936257799  | 1.774475011  |
| SCPEP1                    | 218217_at   | 1.72655595   | 2.04297768   | 2.083431155  |
| LARP6                     | 218651_s_at | 2.731116363  | 3.066978092  | 2.90233228   |
| OBFC1                     | 219100_at   | 1.74443222   | 2.098461072  | 1.898406388  |
| CHAC1                     | 219270_at   | 1.921467016  | 2.072980942  | 1.734139975  |
| BCOR                      | 219433_at   | 2.222876995  | 1.616864134  | 1.360178862  |
| C1orf54                   | 219506_at   | 1.447589094  | 1.927272297  | 2.033445154  |
| OGFR1L                    | 219582_at   | 2.328368949  | 2.634539375  | 1.954292783  |
| ECEL1                     | 219914_at   | 2.371197581  | 2.045993958  | 2.057977248  |
| HRASLS                    | 219983_at   | 2.216438336  | 2.471781511  | 2.233546016  |
| SLC38A4                   | 220786_s_at | 1.869749036  | 2.362461295  | 1.967439986  |
| PSAT1                     | 220892_s_at | 2.888670012  | 2.872973706  | 2.276993923  |
| EIF4EBP1                  | 221539_at   | 2.898328817  | 2.850483226  | 2.519013968  |
| PSAT1                     | 223062_s_at | 3.346270936  | 3.237409471  | 2.652026949  |
| SESN2                     | 223195_s_at | 2.237061323  | 2.105905786  | 1.833625184  |
| SESN2                     | 223196_s_at | 3.046602084  | 2.335932857  | 2.035730632  |
| RAB3IP                    | 223471_at   | 1.945268151  | 2.273736416  | 1.911709862  |
| C14orf4                   | 223474_at   | 2.181498196  | 1.832805581  | 1.669321929  |
| TTYH2                     | 223741_s_at | 1.872869212  | 1.908809976  | 2.253511044  |
| CFC1 /// CFC1B            | 223753_s_at | 2.397261017  | 3.175971502  | 3.281384763  |
| IRF2BP2                   | 224571_at   | 2.49031148   | 2.02437261   | 1.711394681  |
| CSorf32                   | 224707_at   | 1.676901115  | 2.011445697  | 1.903992286  |
| LOC401397                 | 224723_x_at | 1.798288875  | 2.122617094  | 1.726188141  |
| GASS                      | 224741_x_at | 1.966494828  | 2.169847755  | 1.951442283  |
| GASS                      | 224841_x_at | 2.071633415  | 2.217778787  | 1.963583425  |
| C20orf199                 | 224915_x_at | 2.001820774  | 2.227094835  | 1.750136937  |
| CHCHD10                   | 224932_at   | 2.302235086  | 2.338973248  | 2.235791433  |
| LRP11                     | 225060_at   | 2.209707497  | 2.031463279  | 1.61137056   |
| DRAM2                     | 225230_at   | 1.785342419  | 2.171113489  | 1.93425145   |
| AK3L1                     | 225342_at   | 1.768476815  | 2.305769953  | 2.539158961  |
| MTHFD1L                   | 225520_at   | 2.392983537  | 2.145478645  | 1.685101472  |
| CEBPG                     | 225527_at   | 1.915405424  | 2.042207299  | 1.80019336   |
| PTPMT1                    | 225901_at   | 1.99101507   | 2.260027579  | 2.280148774  |
| METRNL                    | 225955_at   | 2.077107608  | 2.00899006   | 1.840962505  |
| SYT13                     | 226086_at   | 2.389075221  | 1.81808609   | 1.668422676  |
| UHRF1BP1                  | 226135_at   | 2.205245522  | 1.935789008  | 1.69672277   |
| C20orf199                 | 226227_x_at | 1.96887936   | 2.177736587  | 1.728478827  |
| FLJ25076                  | 226612_at   | 2.047361542  | 1.54725398   | 1.129353402  |
| ---                       | 226834_at   | 2.138916972  | 2.057912561  | 2.172824391  |
| C20orf199                 | 226835_s_at | 2.112790383  | 2.387919038  | 1.901351576  |
| GRPEL2                    | 226881_at   | 1.972157087  | 2.130501265  | 1.966699396  |
| C17orf58                  | 226901_at   | 2.000543415  | 1.742723975  | 1.496466641  |
| CYP2R1                    | 227109_at   | 2.077363577  | 2.532347288  | 2.40366217   |
| C22orf9                   | 227144_at   | 2.392057547  | 1.978215834  | 1.806366736  |
| SLC16A9                   | 227506_at   | 2.064940557  | 2.148668784  | 1.663850346  |
| CBX4                      | 227558_at   | 2.503256508  | 2.368876797  | 2.300975034  |
| GPX8                      | 227628_at   | 1.934061022  | 2.134596093  | 1.511315457  |
| NCRNA00086 /// NCRNA00087 | 227909_at   | 2.446173641  | 2.498420312  | 2.600383237  |
| FAM85A                    | 227917_at   | 1.638460798  | 1.947695235  | 2.033660647  |
| S1PR3                     | 228176_at   | 2.171068146  | 1.724585379  | 1.597742072  |
| TET1                      | 228906_at   | 2.514098069  | 2.273921765  | 1.964948176  |
| RFLL                      | 228980_at   | 2.038538442  | 1.636497594  | 1.534115404  |
| SNHG7                     | 229050_s_at | 2.905098303  | 2.346885825  | 2.001973746  |
| LOC220930                 | 229090_at   | 1.954093541  | 2.035456156  | 1.904410592  |
| C10orf104                 | 229145_at   | 1.945842038  | 2.02835777   | 1.69360888   |
| ---                       | 229190_at   | 1.947742611  | 2.229354236  | 1.595830336  |
| FAM19A5                   | 229459_at   | 2.232034205  | 1.866065784  | 1.713761246  |
| C12orf76                  | 229679_at   | 1.714178574  | 2.041771476  | 1.809061141  |
| TCP10L                    | 230394_at   | 2.156507444  | 2.885677021  | 2.89891343   |
| IRX1                      | 230472_at   | 2.241548392  | 2.004704402  | 1.858985293  |
| ST6GALNAC5                | 230482_at   | 1.875196685  | 2.027472341  | 2.055532671  |
| SHISA2                    | 230493_at   | 1.991549782  | 2.1639135    | 1.883455204  |
| ANKRD9                    | 230972_at   | 2.249902512  | 2.509972216  | 2.651598767  |
| GPR155                    | 231166_at   | 1.921438313  | 2.40657684   | 3.232090115  |
| LOC730125                 | 232111_at   | 1.881501498  | 2.013188772  | 1.846540633  |
| SLC6A15                   | 232263_at   | 1.988255439  | 2.057940014  | 1.774081343  |
| GATAD2A                   | 234294_x_at | 2.280696625  | 1.901999764  | 1.614655831  |
| LOC148189                 | 235191_at   | 2.313245299  | 2.64455      |              |

| Cluster 3                 |             |              |              |              | Cluster 4  |              |              |              |              |
|---------------------------|-------------|--------------|--------------|--------------|------------|--------------|--------------|--------------|--------------|
| gene names                | probe names | fold change  |              |              | gene names | probe names  | fold change  |              |              |
|                           |             | contr.vs.24h | contr.vs.36h | contr.vs.48h |            |              | contr.vs.24h | contr.vs.36h | contr.vs.48h |
| DKFZP434L187              | 1569476_at  | 0.736820733  | 1.166901626  | 2.176373699  | RASEF      | 1553185_at   | 0.423999843  | 0.548142302  | 1.011904703  |
| S100A4                    | 203186_s_at | 1.298052254  | 1.661452282  | 2.155183283  | RASEF      | 1553186_x_at | 0.405269228  | 0.542673471  | 1.016570735  |
| UNC84A                    | 206487_at   | 0.975662344  | 1.184301239  | 2.180490334  | ---        | 1558714_at   | 0.406837819  | 0.594195601  | 1.055695896  |
| MEG3                      | 210794_s_at | 1.149700025  | 1.306460149  | 2.04470871   | MAP4K4     | 1558732_at   | 0.448458461  | 0.540353381  | 0.94089539   |
| MEG3                      | 212732_at   | 0.89844632   | 1.162440879  | 2.167099919  | LOC728052  | 1558795_at   | 0.495722723  | 0.620028834  | 0.783404841  |
| HNRNP                     | 213359_at   | 1.233204336  | 1.654390432  | 2.309535235  | ---        | 1564378_a_at | 0.428812977  | 0.528390058  | 0.766350849  |
| N4BP2L2                   | 214753_at   | 1.079403451  | 1.559348887  | 2.531878915  | ---        | 1564776_at   | 0.464153468  | 0.653934537  | 0.823672231  |
| GTF2H2B                   | 215470_at   | 0.928370448  | 1.448214448  | 2.404033703  | DDX17      | 213998_s_at  | 0.2907431    | 0.394745159  | 0.601719644  |
| GSDMB                     | 219233_s_at | 1.45212443   | 1.724283984  | 2.734667576  | ATP8B1     | 214594_x_at  | 0.434771601  | 0.501492916  | 0.745397071  |
| LOC100131564              | 227074_at   | 1.009755372  | 1.353554214  | 2.181206288  | ---        | 215448_at    | 0.277560804  | 0.381293469  | 0.56891148   |
| ---                       | 228465_at   | 1.15943543   | 1.539135383  | 2.109927128  | ---        | 216110_x_at  | 0.422074063  | 0.512908848  | 0.790485663  |
| ZNF449                    | 228968_at   | 1.015274222  | 1.57235764   | 2.143902663  | ---        | 216518_at    | 0.466660458  | 0.854331812  | 1.429606717  |
| GART                      | 230097_at   | 1.073549504  | 1.656981429  | 2.755161738  | ---        | 217617_at    | 0.427406218  | 0.579412947  | 0.901621503  |
| NBPF1 /// NBPF3 /// NBPF8 | 230712_at   | 1.090681264  | 1.393062453  | 2.236053246  | ---        | 224254_x_at  | 0.498036239  | 0.68525707   | 1.311077636  |
| DKFZP434L187              | 230861_at   | 1.428308591  | 2.012185549  | 3.055040479  | ---        | 224549_x_at  | 0.478158664  | 0.633460961  | 1.097980555  |
| ---                       | 232628_at   | 0.665480607  | 1.214257554  | 2.190643836  | ANKRD10    | 226663_at    | 0.495556974  | 0.699198482  | 0.980278881  |
| ---                       | 234101_at   | 0.85628983   | 1.301023631  | 2.265463411  | ---        | 230180_at    | 0.253414341  | 0.381267653  | 0.593102121  |
| KCNT2                     | 234103_at   | 1.049563391  | 1.550396894  | 2.127286142  | NDUFS8     | 232169_x_at  | 0.489609647  | 0.586550554  | 1.054317658  |
| MEG3                      | 235077_at   | 0.795358944  | 1.035666389  | 2.041636039  | ---        | 232286_at    | 0.48544998   | 0.626745859  | 0.907599061  |
| ---                       | 235926_at   | 1.019812983  | 1.283698683  | 2.219794104  | ---        | 232726_at    | 0.463788948  | 0.681687033  | 1.150843371  |
| XPO1                      | 235927_at   | 1.222025822  | 1.607175192  | 2.053648148  | EBF1       | 233261_at    | 0.457859289  | 0.643937447  | 1.036868765  |
| ---                       | 236417_at   | 1.024889109  | 1.489138304  | 2.322317278  | ---        | 233401_at    | 0.482368548  | 0.619779527  | 0.969094356  |
| FDFT1                     | 241954_at   | 0.788368913  | 1.109658756  | 2.115837702  | ---        | 234074_at    | 0.473664941  | 0.636728455  | 0.824830827  |
| ---                       | 243020_at   | 0.839995531  | 1.327893228  | 2.053357486  | ---        | 235693_at    | 0.499061303  | 0.78446783   | 1.282814758  |
| ---                       | 243514_at   | 0.85203251   | 1.239802415  | 2.400614499  | ---        | 235716_at    | 0.450841843  | 0.609352393  | 0.923715072  |
| ---                       | 244075_at   | 0.949800147  | 1.389789029  | 2.316454681  | ---        | 237007_at    | 0.40281685   | 0.557730659  | 0.871251275  |
|                           |             |              |              |              | ---        | 239393_at    | 0.450054806  | 0.620050034  | 0.92926722   |
|                           |             |              |              |              | ---        | 240758_at    | 0.484299638  | 0.649804235  | 1.435884747  |
|                           |             |              |              |              | ---        | 242052_at    | 0.49005571   | 0.707333028  | 1.479732532  |
|                           |             |              |              |              | ---        | 242558_at    | 0.400208801  | 0.608971249  | 1.110692398  |
|                           |             |              |              |              | ---        | 243756_at    | 0.454604283  | 0.643320107  | 1.029361778  |
|                           |             |              |              |              | ---        | 243819_at    | 0.468470142  | 0.678881602  | 1.040923962  |
|                           |             |              |              |              | ---        | 244420_at    | 0.478275534  | 0.72638577   | 1.065696055  |
|                           |             |              |              |              | ---        | 244625_at    | 0.445207019  | 0.681604874  | 1.229391883  |

| 24 h                                                      |                  |             | 36 h                                                      |                  |             | 48 h                                                      |                  |             |
|-----------------------------------------------------------|------------------|-------------|-----------------------------------------------------------|------------------|-------------|-----------------------------------------------------------|------------------|-------------|
| Gene names                                                | log2 fold change | fold change | Gene names                                                | log2 fold change | fold change | Gene names                                                | log2 fold change | fold change |
| <b>Down-regulated genes (fold change cutoff &lt; 0.5)</b> |                  |             | <b>Down-regulated genes (fold change cutoff &lt; 0.5)</b> |                  |             | <b>Down-regulated genes (fold change cutoff &lt; 0.5)</b> |                  |             |
| RPS12P26                                                  | -4.76865         | 0.03669     | MT-ND6                                                    | -3.83336         | 0.07015     | MT-ND6                                                    | -3.75665         | 0.07398     |
| MT-ND6                                                    | -3.47861         | 0.08971     | LYPD1                                                     | -3.54149         | 0.08588     | TRPC4                                                     | -3.74635         | 0.07451     |
| MT-CO2                                                    | -3.12227         | 0.11484     | MT-CO2                                                    | -3.47024         | 0.09023     | SCUBE3                                                    | -3.72522         | 0.07561     |
| HES3                                                      | -3.05609         | 0.12023     | MT-CO3                                                    | -3.43386         | 0.09253     | MT-CO3                                                    | -3.58686         | 0.08322     |
| MT-ND3                                                    | -2.64026         | 0.16040     | KCND2                                                     | -3.35707         | 0.09759     | EOMES                                                     | -3.56318         | 0.08460     |
| MT-CYB                                                    | -2.52915         | 0.17324     | MT-ND3                                                    | -3.29946         | 0.10157     | MT-ND3                                                    | -3.55498         | 0.08508     |
| TXNIP                                                     | -2.49957         | 0.17683     | MT-CYB                                                    | -3.13708         | 0.11367     | MT-CO2                                                    | -3.53416         | 0.08632     |
| ATP5A1P5                                                  | -2.16728         | 0.22263     | SCUBE3                                                    | -2.83197         | 0.14044     | RRM2                                                      | -3.53145         | 0.08648     |
| TRPC4                                                     | -2.12088         | 0.22991     | RRM2                                                      | -2.78777         | 0.14481     | LYPD1                                                     | -3.43524         | 0.09245     |
| LRRN4CL                                                   | -2.10349         | 0.23269     | TRIM58                                                    | -2.76554         | 0.14706     | MT-CYB                                                    | -3.41703         | 0.09362     |
| BARHL2                                                    | -2.01766         | 0.24696     | SCML4                                                     | -2.70891         | 0.15295     | BARHL2                                                    | -2.97816         | 0.12691     |
| DNAJC22                                                   | -2.00643         | 0.24889     | DNAJC22                                                   | -2.65743         | 0.15850     | LMO3                                                      | -2.97217         | 0.12743     |
| COX6B1P1                                                  | -1.96074         | 0.25690     | BARHL2                                                    | -2.65188         | 0.15911     | PLXNA4                                                    | -2.95516         | 0.12895     |
| EOMES                                                     | -1.91382         | 0.26539     | EOMES                                                     | -2.64522         | 0.15985     | DNAJC22                                                   | -2.90121         | 0.13386     |
| GAPDHP44                                                  | -1.90653         | 0.26673     | SYNPR                                                     | -2.46014         | 0.18173     | TDRG1                                                     | -2.87953         | 0.13589     |
| SCUBE3                                                    | -1.90531         | 0.26696     | MT-ND5                                                    | -2.40909         | 0.18827     | CDC6                                                      | -2.82098         | 0.14151     |
| PENK                                                      | -1.89239         | 0.26936     | PENK                                                      | -2.38892         | 0.19093     | SPOCK3                                                    | -2.75172         | 0.14847     |
| TRIM58                                                    | -1.86488         | 0.27455     | CDH18                                                     | -2.37603         | 0.19264     | HIST1H3E                                                  | -2.73429         | 0.15028     |
| ACTG1P9                                                   | -1.85147         | 0.27711     | FAM181B                                                   | -2.36908         | 0.19357     | ASF1B                                                     | -2.72413         | 0.15134     |
| LRRN3                                                     | -1.81054         | 0.28508     | TDRG1                                                     | -2.36465         | 0.19416     | NCAM2                                                     | -2.72057         | 0.15171     |
| RRM2                                                      | -1.77049         | 0.29311     | TXNIP                                                     | -2.31407         | 0.20109     | MCM10                                                     | -2.71633         | 0.15216     |
| RN7SL1                                                    | -1.76685         | 0.29385     | PLXNA2                                                    | -2.31383         | 0.20113     | NGB                                                       | -2.69489         | 0.15444     |
| PCDH11X                                                   | -1.69179         | 0.30954     | LMO3                                                      | -2.30889         | 0.20182     | CDH18                                                     | -2.67041         | 0.15708     |
| HIST1H2BG                                                 | -1.62535         | 0.32413     | LRRN4CL                                                   | -2.29008         | 0.20446     | SEMA3D                                                    | -2.64762         | 0.15958     |
| SCML4                                                     | -1.62137         | 0.32503     | PLXNA4                                                    | -2.25042         | 0.21016     | LRRN4CL                                                   | -2.64708         | 0.15964     |
| EPHA7                                                     | -1.58741         | 0.33277     | GAPDHP72                                                  | -2.23725         | 0.21209     | GTSE1                                                     | -2.64218         | 0.16019     |
| ISM1                                                      | -1.58684         | 0.33290     | GALR1                                                     | -2.21394         | 0.21554     | DLGAP5                                                    | -2.63687         | 0.16078     |
| GALR1                                                     | -1.58316         | 0.33375     | NGB                                                       | -2.17974         | 0.22072     | NXP2                                                      | -2.62457         | 0.16215     |
| RNA5-8SP3                                                 | -1.55697         | 0.33986     | MT-ATP6                                                   | -2.17073         | 0.22210     | TRIM58                                                    | -2.60536         | 0.16433     |
| MT-ATP6                                                   | -1.53743         | 0.34450     | MT-ND2                                                    | -2.16575         | 0.22287     | MT-ND5                                                    | -2.59187         | 0.16587     |
| MMP16                                                     | -1.53579         | 0.34489     | SPOCK3                                                    | -2.11634         | 0.23063     | KIF18B                                                    | -2.57505         | 0.16782     |
| LMO3                                                      | -1.51359         | 0.35024     | CDC6                                                      | -2.11276         | 0.23120     | ASPM                                                      | -2.57062         | 0.16833     |
| CALM2P3                                                   | -1.50916         | 0.35132     | SEMA3D                                                    | -2.08514         | 0.23567     | CTGF                                                      | -2.51792         | 0.17459     |
| SEMA3D                                                    | -1.50428         | 0.35251     | BRIP1                                                     | -2.07647         | 0.23709     | E2F7                                                      | -2.51065         | 0.17548     |
| MT-ND2                                                    | -1.46554         | 0.36210     | MT-ND1                                                    | -2.07647         | 0.23709     | TXNIP                                                     | -2.50427         | 0.17625     |
| MT-ND1                                                    | -1.46061         | 0.36334     | ORC1                                                      | -2.00475         | 0.24918     | BRIP1                                                     | -2.49738         | 0.17710     |
| ARRDC4                                                    | -1.45874         | 0.36381     | PCDH11X                                                   | -1.95011         | 0.25880     | ORC1                                                      | -2.49008         | 0.17800     |
| HIST2H2BE                                                 | -1.43714         | 0.36930     | DLGAP5                                                    | -1.94422         | 0.25986     | GALR1                                                     | -2.47187         | 0.18026     |
| BRIP1                                                     | -1.40605         | 0.37734     | CTGF                                                      | -1.92178         | 0.26393     | HIST1H2BG                                                 | -2.45961         | 0.18180     |
| HSP90B2P                                                  | -1.39983         | 0.37897     | LRRN3                                                     | -1.91123         | 0.26587     | PENK                                                      | -2.44262         | 0.18395     |
| FOXJ1                                                     | -1.39052         | 0.38143     | CNTN5                                                     | -1.90448         | 0.26711     | MT-ATP6                                                   | -2.42299         | 0.18647     |
| BMP5                                                      | -1.38851         | 0.38196     | HIST1H2BG                                                 | -1.89627         | 0.26864     | CTXN3                                                     | -2.41831         | 0.18708     |
| ORC1                                                      | -1.38036         | 0.38412     | ISM1                                                      | -1.88916         | 0.26996     | MT-ND2                                                    | -2.40714         | 0.18853     |
| LY6G5C                                                    | -1.37972         | 0.38429     | FAT4                                                      | -1.86481         | 0.27456     | MT-ND1                                                    | -2.38722         | 0.19115     |
| HSP90B3P                                                  | -1.37784         | 0.38479     | AURKB                                                     | -1.86421         | 0.27467     | AURKB                                                     | -2.37183         | 0.19320     |



| 24 h       |                  |             | 36 h       |                  |             | 48 h       |                  |             |
|------------|------------------|-------------|------------|------------------|-------------|------------|------------------|-------------|
| Gene names | log2 fold change | fold change | Gene names | log2 fold change | fold change | Gene names | log2 fold change | fold change |
| CDR1       | -1.37669         | 0.38510     | CDK1       | -1.86266         | 0.27497     | SYNPR      | -2.37179         | 0.19321     |
| POU3F2     | -1.37496         | 0.38556     | DSCC1      | -1.85889         | 0.27569     | UBE2C      | -2.36826         | 0.19368     |
| TDRG1      | -1.35862         | 0.38996     | FAM64A     | -1.83688         | 0.27993     | BIRC5      | -2.36415         | 0.19423     |
| ASF1B      | -1.34759         | 0.39295     | MT-ND4     | -1.82023         | 0.28318     | FAM181B    | -2.34469         | 0.19687     |
| PTCHD4     | -1.34528         | 0.39358     | EPHA7      | -1.80308         | 0.28656     | CNTN5      | -2.33184         | 0.19863     |
| FAM181B    | -1.34002         | 0.39502     | TYMS       | -1.79402         | 0.28837     | E2F2       | -2.32465         | 0.19962     |
| RANP6      | -1.33539         | 0.39628     | HIST1H3E   | -1.78618         | 0.28994     | DIAPH3     | -2.31695         | 0.20069     |
| STC1       | -1.33461         | 0.39650     | KIF4A      | -1.78321         | 0.29054     | ANKDD1B    | -2.29729         | 0.20344     |
| CNTN5      | -1.32748         | 0.39846     | FOXJ1      | -1.77423         | 0.29235     | GCNT4      | -2.29168         | 0.20424     |
| FAT4       | -1.32297         | 0.39971     | DRGX       | -1.77322         | 0.29256     | BUB1       | -2.29056         | 0.20440     |
| RNA5-8SP2  | -1.31293         | 0.40250     | NUSAP1     | -1.77051         | 0.29311     | NDC80      | -2.28816         | 0.20474     |
| B3GAT2     | -1.30374         | 0.40507     | ZWINT      | -1.75329         | 0.29662     | PCDH11X    | -2.27866         | 0.20609     |
| HIST1H3E   | -1.29817         | 0.40664     | BIRC5      | -1.74288         | 0.29877     | FAM64A     | -2.27843         | 0.20612     |
| LHX9       | -1.27017         | 0.41461     | ASPM       | -1.74028         | 0.29931     | TOP2A      | -2.24052         | 0.21161     |
| PCDH20     | -1.26622         | 0.41575     | NEIL3      | -1.73929         | 0.29952     | DBC1       | -2.22956         | 0.21322     |
| MEOX2      | -1.23728         | 0.42417     | ID1        | -1.72742         | 0.30199     | KCNK10     | -2.21652         | 0.21516     |
| E2F2       | -1.22729         | 0.42712     | BMP2       | -1.70653         | 0.30640     | ZWINT      | -2.20475         | 0.21692     |
| RNA18S5    | -1.21439         | 0.43096     | CTXN3      | -1.70417         | 0.30690     | CHRN4      | -2.20448         | 0.21696     |
| DSCC1      | -1.19348         | 0.43725     | SYT6       | -1.66013         | 0.31641     | EPHA7      | -2.17945         | 0.22076     |
| FAM171B    | -1.15431         | 0.44928     | TRH        | -1.65545         | 0.31744     | KIF14      | -2.17546         | 0.22137     |
| HSP90B1    | -1.14887         | 0.45098     | KIF18B     | -1.65404         | 0.31775     | CCNA2      | -2.16528         | 0.22294     |
| DNAJC3     | -1.14799         | 0.45125     | HIST2H2BE  | -1.65104         | 0.31841     | MT-ND4     | -2.16231         | 0.22340     |
| ANKRD30BL  | -1.14445         | 0.45236     | GCNT4      | -1.64838         | 0.31900     | CDCA8      | -2.15747         | 0.22415     |
| KCTD12     | -1.14428         | 0.45242     | CDCA8      | -1.59119         | 0.33190     | KIFC1      | -2.15444         | 0.22462     |
| RPL3P2     | -1.13541         | 0.45521     | NGFR       | -1.59112         | 0.33191     | DSCC1      | -2.14383         | 0.22628     |
| ARHGEF26   | -1.13452         | 0.45549     | NDC80      | -1.58554         | 0.33320     | NEIL3      | -2.13487         | 0.22769     |
| BZW1P1     | -1.13404         | 0.45564     | CUX2       | -1.55784         | 0.33966     | BMP2       | -2.12277         | 0.22961     |
| ZBED6      | -1.13373         | 0.45574     | KIF14      | -1.55279         | 0.34085     | KIF15      | -2.09617         | 0.23388     |
| EPHA3      | -1.12427         | 0.45873     | TOP2A      | -1.55141         | 0.34118     | XRCC2      | -2.07531         | 0.23728     |
| ZNF804A    | -1.12334         | 0.45903     | MLF1IP     | -1.53689         | 0.34463     | RMI2       | -2.05507         | 0.24064     |
| ZNF708     | -1.12147         | 0.45963     | MYBL2      | -1.53307         | 0.34554     | CCNB2      | -2.03477         | 0.24405     |
| CALM2P4    | -1.11924         | 0.46034     | CENPF      | -1.52318         | 0.34792     | FAM83D     | -2.02486         | 0.24573     |
| MT-ND4     | -1.11554         | 0.46152     | BUB1       | -1.51931         | 0.34885     | MIR17HG    | -2.02174         | 0.24626     |
| PIM2       | -1.11528         | 0.46160     | XRCC2      | -1.50627         | 0.35202     | MYBL2      | -2.02094         | 0.24640     |
| DBC1       | -1.11195         | 0.46267     | DBC1       | -1.50379         | 0.35263     | TRH        | -2.00132         | 0.24977     |
| SCN3A      | -1.11106         | 0.46295     | CHRN4      | -1.48643         | 0.35689     | HIST2H2BE  | -1.99902         | 0.25017     |
| GCNT4      | -1.10848         | 0.46378     | ISL1       | -1.48623         | 0.35694     | ISM1       | -1.99884         | 0.25020     |
| TTK        | -1.10564         | 0.46470     | MEOX2      | -1.47292         | 0.36025     | SYT6       | -1.97463         | 0.25444     |
| ETNK1      | -1.10404         | 0.46521     | CCNB1      | -1.46447         | 0.36237     | FOXJ1      | -1.95535         | 0.25786     |
| PCDH9      | -1.10048         | 0.46636     | ACTN3      | -1.45177         | 0.36557     | NGFR       | -1.92895         | 0.26262     |
| SFMBT2     | -1.09539         | 0.46801     | STC1       | -1.42549         | 0.37229     | TYMS       | -1.91995         | 0.26426     |
| LNPEP      | -1.08639         | 0.47094     | UBE2C      | -1.41582         | 0.37480     | FAT4       | -1.91801         | 0.26462     |
| DSEL       | -1.07963         | 0.47315     | MAD2L1     | -1.41398         | 0.37527     | NR5A2      | -1.91124         | 0.26586     |
| CSRNP3     | -1.07366         | 0.47511     | MIR17HG    | -1.40648         | 0.37723     | ACTN3      | -1.89639         | 0.26861     |
| CUX2       | -1.07339         | 0.47520     | POU3F2     | -1.40314         | 0.37811     | SFMBT2     | -1.89192         | 0.26945     |
| EDIL3      | -1.06873         | 0.47674     | ARHGEF26   | -1.39793         | 0.37947     | PRR11      | -1.88464         | 0.27081     |

| 24 h                                                  |                  |             | 36 h       |                  |             | 48 h       |                  |             |
|-------------------------------------------------------|------------------|-------------|------------|------------------|-------------|------------|------------------|-------------|
| Gene names                                            | log2 fold change | fold change | Gene names | log2 fold change | fold change | Gene names | log2 fold change | fold change |
| KLHL4                                                 | -1.06244         | 0.47882     | NR5A2      | -1.37171         | 0.38643     | CEP55      | -1.85187         | 0.27703     |
| TMTC1                                                 | -1.06082         | 0.47936     | EPHA3      | -1.36281         | 0.38882     | CUX2       | -1.85038         | 0.27732     |
| NRGN                                                  | -1.05998         | 0.47964     | WDR62      | -1.35916         | 0.38981     | STC1       | -1.82904         | 0.28145     |
| SLITRK1                                               | -1.05977         | 0.47971     | C17orf53   | -1.35198         | 0.39175     | EPHA3      | -1.80964         | 0.28526     |
| NGFR                                                  | -1.05676         | 0.48071     | AMH        | -1.35068         | 0.39211     | GPR83      | -1.80818         | 0.28555     |
| ST8SIA4                                               | -1.04999         | 0.48297     | GRIA2      | -1.34579         | 0.39344     | TMEFF2     | -1.80274         | 0.28663     |
| DRGX                                                  | -1.04859         | 0.48344     | NEGR1      | -1.33496         | 0.39640     | MGAT4C     | -1.79388         | 0.28840     |
| TRH                                                   | -1.03547         | 0.48786     | HS3ST3B1   | -1.32514         | 0.39911     | WDR62      | -1.78985         | 0.28920     |
| ZWINT                                                 | -1.03403         | 0.48834     | CCNB2      | -1.32334         | 0.39961     | LRP1B      | -1.77737         | 0.29171     |
| C5orf55                                               | -1.02647         | 0.49091     | B3GAT2     | -1.28853         | 0.40937     | NCAPH      | -1.76305         | 0.29462     |
| FIGN                                                  | -1.00529         | 0.49817     | SORBS1     | -1.27863         | 0.41219     | ATAD2      | -1.75482         | 0.29631     |
| <b>Up-regulated genes (fold change cutoff &gt; 2)</b> |                  |             | C1QL4      | -1.27863         | 0.41219     | HIST1H4H   | -1.74888         | 0.29753     |
| IRAK1                                                 | 1.00015          | 2.00021     | CRABP1     | -1.27545         | 0.41310     | AMOTL2     | -1.72307         | 0.30290     |
| TPPP3                                                 | 1.00102          | 2.00141     | UNC5D      | -1.23336         | 0.42533     | NELL2      | -1.70343         | 0.30706     |
| SRXN1                                                 | 1.00563          | 2.00782     | KIF11      | -1.23003         | 0.42631     | AMH        | -1.68207         | 0.31164     |
| KLHDC8A                                               | 1.00903          | 2.01256     | CDH10      | -1.21693         | 0.43020     | MEOX2      | -1.67433         | 0.31331     |
| RBFOX3                                                | 1.01286          | 2.01791     | ZNF804A    | -1.21499         | 0.43078     | SORBS1     | -1.65779         | 0.31692     |
| RFNG                                                  | 1.01527          | 2.02128     | SST        | -1.21057         | 0.43210     | HIST1H2AC  | -1.63059         | 0.32296     |
| STARD10                                               | 1.01555          | 2.02167     | HMGA2      | -1.20721         | 0.43311     | MMP16      | -1.61882         | 0.32560     |
| STAC2                                                 | 1.01642          | 2.02289     | GPR83      | -1.20014         | 0.43523     | C1QL4      | -1.60714         | 0.32825     |
| NID1                                                  | 1.01662          | 2.02317     | WLS        | -1.19974         | 0.43535     | ISL1       | -1.60645         | 0.32841     |
| TMEM161A                                              | 1.01724          | 2.02404     | PCDH17     | -1.17274         | 0.44358     | CRABP1     | -1.59835         | 0.33025     |
| KLF16                                                 | 1.02705          | 2.03785     | LNPEP      | -1.17077         | 0.44418     | PCDH17     | -1.59179         | 0.33176     |
| DUSP14                                                | 1.02777          | 2.03887     | RBM3       | -1.14854         | 0.45108     | KIF11      | -1.58294         | 0.33380     |
| KREMEN1                                               | 1.03151          | 2.04416     | VN1R48P    | -1.14135         | 0.45334     | ARHGEF26   | -1.57721         | 0.33513     |
| DOCK6                                                 | 1.03586          | 2.05034     | HSP90B2P   | -1.13626         | 0.45494     | UNC5D      | -1.57207         | 0.33633     |
| PPAPDC3                                               | 1.03626          | 2.05090     | CHAF1A     | -1.12859         | 0.45736     | VN1R48P    | -1.56101         | 0.33891     |
| SARS                                                  | 1.03716          | 2.05218     | PCDH9      | -1.12245         | 0.45931     | LEF1       | -1.55402         | 0.34056     |
| FTH1                                                  | 1.04059          | 2.05707     | CHRD1      | -1.11315         | 0.46228     | HNRNPM     | -1.55161         | 0.34113     |
| RAMP2                                                 | 1.04134          | 2.05814     | FXD7       | -1.09763         | 0.46728     | HMGA2      | -1.51076         | 0.35093     |
| CLDN5                                                 | 1.04558          | 2.06420     | HSP90B3P   | -1.09242         | 0.46897     | SST        | -1.49786         | 0.35408     |
| BDKRB2                                                | 1.05033          | 2.07100     | PCDHB4     | -1.08661         | 0.47087     | FXD7       | -1.46207         | 0.36297     |
| PKN1                                                  | 1.05689          | 2.08044     | NELL2      | -1.08217         | 0.47232     | MRM1       | -1.44639         | 0.36694     |
| CARS                                                  | 1.05752          | 2.08135     | ARRDC4     | -1.07053         | 0.47614     | C17orf53   | -1.42627         | 0.37209     |
| SERPINB6                                              | 1.05994          | 2.08484     | H2AFX      | -1.06682         | 0.47737     | TPX2       | -1.42005         | 0.37370     |
| SHANK3                                                | 1.06304          | 2.08933     | SGOL2      | -1.06493         | 0.47800     | B3GAT2     | -1.40995         | 0.37632     |
| SIT1                                                  | 1.06581          | 2.09334     | LMNB1      | -1.05934         | 0.47985     | WLS        | -1.40822         | 0.37678     |
| CD55                                                  | 1.06628          | 2.09403     | ISL2       | -1.05665         | 0.48075     | FJX1       | -1.40291         | 0.37817     |
| ICAM5                                                 | 1.06653          | 2.09439     | KLHL4      | -1.05261         | 0.48210     | NCOA5      | -1.39557         | 0.38009     |
| SYT7                                                  | 1.06665          | 2.09456     | ELAVL4     | -1.05116         | 0.48258     | POU3F2     | -1.38343         | 0.38331     |
| C1orf233                                              | 1.06674          | 2.09469     | FJX1       | -1.03795         | 0.48702     | RNF152     | -1.36857         | 0.38727     |
| IFITM1                                                | 1.06875          | 2.09762     | PRR11      | -1.03636         | 0.48756     | HIST1H2AG  | -1.36325         | 0.38871     |
| FAM149A                                               | 1.07432          | 2.10573     | LIG1       | -1.03333         | 0.48858     | CDH10      | -1.35448         | 0.39108     |
| EMP3                                                  | 1.07709          | 2.10978     | BAI3       | -1.02697         | 0.49074     | SFPQP1     | -1.34614         | 0.39334     |
| AEBP1                                                 | 1.08774          | 2.12541     | HSP90B1    | -1.02536         | 0.49129     | PCDH9      | -1.33076         | 0.39756     |
| FABP3                                                 | 1.08786          | 2.12559     | TPX2       | -1.01894         | 0.49348     | LMNB1      | -1.32363         | 0.39953     |



| 24 h       |                  |             | 36 h                                                  |                  |             | 48 h       |                  |             |
|------------|------------------|-------------|-------------------------------------------------------|------------------|-------------|------------|------------------|-------------|
| Gene names | log2 fold change | fold change | Gene names                                            | log2 fold change | fold change | Gene names | log2 fold change | fold change |
| CHST1      | 1.09695          | 2.13902     | RFC3                                                  | -1.01295         | 0.49553     | H2AFX      | -1.32177         | 0.40004     |
| PPDPF      | 1.09722          | 2.13942     | <b>Up-regulated genes (fold change cutoff &gt; 2)</b> |                  |             | MAD2L1     | -1.31939         | 0.40070     |
| ATP2A3     | 1.09771          | 2.14015     | SIX2                                                  | 1.00231          | 2.00320     | PTN        | -1.30413         | 0.40497     |
| RHPN1      | 1.09876          | 2.14171     | C1orf115                                              | 1.00315          | 2.00437     | KIF20B     | -1.30331         | 0.40520     |
| DKK3       | 1.10735          | 2.15450     | LINC00617                                             | 1.00679          | 2.00944     | ING3       | -1.30161         | 0.40567     |
| HK2        | 1.11089          | 2.15979     | ARL4C                                                 | 1.00918          | 2.01277     | DEPDC1B    | -1.27727         | 0.41258     |
| MPST       | 1.11112          | 2.16013     | BCAT2                                                 | 1.01134          | 2.01578     | FBXO5      | -1.27589         | 0.41297     |
| ATF4P4     | 1.11223          | 2.16180     | CCDC8                                                 | 1.01501          | 2.02092     | VSTM2B     | -1.27442         | 0.41339     |
| SIX2       | 1.11659          | 2.16834     | DUSP14                                                | 1.01504          | 2.02096     | BNC2       | -1.26974         | 0.41473     |
| RHBDF2     | 1.11687          | 2.16876     | FGF11                                                 | 1.01621          | 2.02260     | LARGE      | -1.24507         | 0.42189     |
| XBP1       | 1.12024          | 2.17383     | TRPM4                                                 | 1.01684          | 2.02348     | SLC24A3    | -1.24042         | 0.42325     |
| TRPM4      | 1.12329          | 2.17843     | CHST1                                                 | 1.02105          | 2.02940     | B3GALT2    | -1.22468         | 0.42789     |
| CHPT1      | 1.12388          | 2.17932     | SHISA2                                                | 1.02385          | 2.03334     | BMP5       | -1.22305         | 0.42838     |
| N4BP3      | 1.12537          | 2.18157     | HRC                                                   | 1.02388          | 2.03338     | BAI3       | -1.22115         | 0.42894     |
| FAM222A    | 1.13042          | 2.18922     | TH                                                    | 1.02454          | 2.03431     | HIST1H2BK  | -1.22032         | 0.42919     |
| BOK        | 1.13268          | 2.19266     | MLST8                                                 | 1.02821          | 2.03949     | GNAT3      | -1.21654         | 0.43031     |
| ROBO3      | 1.13389          | 2.19450     | ENDOD1                                                | 1.02947          | 2.04127     | SALL3      | -1.18658         | 0.43934     |
| WARS       | 1.13634          | 2.19823     | RASL10B                                               | 1.03126          | 2.04381     | ZNF85      | -1.18373         | 0.44021     |
| TNFRSF1A   | 1.13836          | 2.20131     | ZNFX1-AS1                                             | 1.03459          | 2.04853     | DNER       | -1.17018         | 0.44437     |
| RPH3AL     | 1.14113          | 2.20554     | ITGA4                                                 | 1.03652          | 2.05127     | HS3ST2     | -1.15504         | 0.44905     |
| DLG4       | 1.14269          | 2.20792     | IRX1                                                  | 1.03804          | 2.05344     | RNF125     | -1.14717         | 0.45151     |
| TNFRSF10B  | 1.14547          | 2.21218     | GPRC5C                                                | 1.03912          | 2.05497     | NTN1       | -1.14648         | 0.45173     |
| SLC1A4     | 1.14571          | 2.21255     | CMTM4                                                 | 1.04178          | 2.05877     | SLITRK1    | -1.14548         | 0.45204     |
| MMP17      | 1.14715          | 2.21476     | ALAS1                                                 | 1.04682          | 2.06597     | SEMA3E     | -1.14408         | 0.45248     |
| CTSL1      | 1.14778          | 2.21573     | HAX1                                                  | 1.04869          | 2.06865     | ZNF708     | -1.14149         | 0.45329     |
| MTSS1L     | 1.14894          | 2.21751     | HCN2                                                  | 1.05233          | 2.07388     | TTC9       | -1.12426         | 0.45874     |
| YARS       | 1.14934          | 2.21812     | PPDPF                                                 | 1.05658          | 2.07999     | FZD1       | -1.12194         | 0.45948     |
| OGFRL1     | 1.14947          | 2.21832     | PPARGC1B                                              | 1.05832          | 2.08251     | LIG1       | -1.10467         | 0.46501     |
| HES4       | 1.15085          | 2.22045     | PADI2                                                 | 1.05943          | 2.08411     | C5orf30    | -1.09541         | 0.46800     |
| ISG15      | 1.15199          | 2.22220     | TNFAIP8L1                                             | 1.06585          | 2.09340     | LSM11      | -1.09511         | 0.46810     |
| GRIN2D     | 1.15281          | 2.22347     | TAGLN2                                                | 1.07272          | 2.10340     | PCDHB4     | -1.09427         | 0.46837     |
| EXOC3L1    | 1.15318          | 2.22404     | SARS                                                  | 1.07298          | 2.10377     | CHAF1A     | -1.08677         | 0.47081     |
| IRX1       | 1.15361          | 2.22470     | C21orf77                                              | 1.08077          | 2.11516     | SLITRK5    | -1.08364         | 0.47184     |
| SH3BP4     | 1.15577          | 2.22803     | CCDC155                                               | 1.08082          | 2.11524     | SRSF3      | -1.06437         | 0.47818     |
| GAL        | 1.15624          | 2.22876     | PTPRM                                                 | 1.08259          | 2.11783     | NR2F1      | -1.06366         | 0.47842     |
| WSCD1      | 1.15745          | 2.23063     | GRPEL2                                                | 1.08845          | 2.12645     | ZNF180     | -1.06304         | 0.47862     |
| TRIM72     | 1.15776          | 2.23111     | PYCR1                                                 | 1.08893          | 2.12716     | TRA2A      | -1.04464         | 0.48477     |
| SIX3       | 1.16039          | 2.23518     | CARS                                                  | 1.09187          | 2.13150     | GBE1       | -1.04135         | 0.48587     |
| C18orf1    | 1.16293          | 2.23912     | GADD45G                                               | 1.09254          | 2.13249     | NKAIN2     | -1.03835         | 0.48688     |
| CHST8      | 1.16312          | 2.23941     | IRAK1                                                 | 1.09551          | 2.13689     | SMG9       | -1.03353         | 0.48851     |
| GFPT2      | 1.16634          | 2.24442     | CEBPG                                                 | 1.09733          | 2.13958     | MOB3B      | -1.02982         | 0.48977     |
| KIAA1644   | 1.17056          | 2.25099     | SGPP2                                                 | 1.10056          | 2.14438     | C10orf114  | -1.02297         | 0.49210     |
| XPOT       | 1.17152          | 2.25249     | KLHDC8A                                               | 1.10065          | 2.14451     | CLSTN2     | -1.01573         | 0.49458     |
| RNF112     | 1.17489          | 2.25776     | KIAA1644                                              | 1.10218          | 2.14679     | HSP90B1    | -1.01223         | 0.49578     |
| SOX8       | 1.17491          | 2.25779     | ZNF600                                                | 1.10313          | 2.14820     | EPC2       | -1.01034         | 0.49643     |
| ARHGAP23   | 1.17709          | 2.26120     | UBTD1                                                 | 1.10569          | 2.15202     | HSP90B2P   | -1.00721         | 0.49751     |

| 24 h       |                  |             | 36 h       |                  |             | 48 h                                                  |                  |             |
|------------|------------------|-------------|------------|------------------|-------------|-------------------------------------------------------|------------------|-------------|
| Gene names | log2 fold change | fold change | Gene names | log2 fold change | fold change | Gene names                                            | log2 fold change | fold change |
| C5orf65    | 1.17998          | 2.26574     | SRL        | 1.10628          | 2.15290     | TP53                                                  | -1.00528         | 0.49817     |
| PHYHIP     | 1.18608          | 2.27534     | GTPBP2     | 1.10773          | 2.15506     | MAGI2                                                 | -1.00095         | 0.49967     |
| KLF9       | 1.18901          | 2.27996     | ARL4D      | 1.11154          | 2.16076     | <b>Up-regulated genes (fold change cutoff &gt; 2)</b> |                  |             |
| GARS       | 1.18914          | 2.28017     | SNHG7      | 1.11287          | 2.16275     | IGSF8                                                 | 1.00071          | 2.00098     |
| COL18A1    | 1.19004          | 2.28159     | GM2A       | 1.11895          | 2.17189     | SIX2                                                  | 1.00368          | 2.00511     |
| RPL23P8    | 1.19039          | 2.28214     | C1orf233   | 1.11906          | 2.17205     | TRPM4                                                 | 1.00401          | 2.00557     |
| FLNC       | 1.19185          | 2.28445     | SYT3       | 1.12745          | 2.18472     | PRKD2                                                 | 1.00765          | 2.01063     |
| KIAA1161   | 1.19908          | 2.29593     | N4BP3      | 1.13084          | 2.18986     | RFPL4B                                                | 1.01214          | 2.01690     |
| GAS2L1     | 1.19945          | 2.29652     | C5orf65    | 1.13099          | 2.19009     | LOXL1                                                 | 1.01469          | 2.02047     |
| TMEM240    | 1.20429          | 2.30424     | MFAP2      | 1.13238          | 2.19220     | S1PR3                                                 | 1.01582          | 2.02205     |
| EPPK1      | 1.20432          | 2.30429     | SOX8       | 1.13465          | 2.19565     | IRX1                                                  | 1.01697          | 2.02366     |
| SYNGR2     | 1.20482          | 2.30509     | PHYHIP     | 1.14131          | 2.20581     | HLA-A                                                 | 1.01714          | 2.02390     |
| NCR3LG1    | 1.20731          | 2.30907     | BCAM       | 1.14784          | 2.21582     | OLFM1                                                 | 1.01721          | 2.02400     |
| DOC2B      | 1.20754          | 2.30944     | TSPAN15    | 1.14917          | 2.21786     | BCAT2                                                 | 1.02022          | 2.02823     |
| RRAS       | 1.20814          | 2.31040     | RAMP2      | 1.15058          | 2.22003     | SNAI2                                                 | 1.02359          | 2.03297     |
| VGF        | 1.20847          | 2.31092     | GRIN2D     | 1.15148          | 2.22142     | YARS                                                  | 1.02586          | 2.03617     |
| FMNL1      | 1.20922          | 2.31213     | SYT2       | 1.15407          | 2.22541     | MFNG                                                  | 1.02784          | 2.03897     |
| CACNG5     | 1.21475          | 2.32101     | SH3RF3     | 1.15526          | 2.22724     | PGPEP1                                                | 1.03023          | 2.04235     |
| ZNF204P    | 1.21762          | 2.32563     | HSPB1      | 1.15545          | 2.22754     | XBP1                                                  | 1.03113          | 2.04362     |
| IGHM       | 1.22642          | 2.33986     | AIF1L      | 1.16164          | 2.23712     | KRT33B                                                | 1.03205          | 2.04493     |
| HSPB1      | 1.22849          | 2.34322     | DKK3       | 1.16315          | 2.23946     | GLB1L2                                                | 1.03861          | 2.05425     |
| GADD45G    | 1.24439          | 2.36918     | PMEL       | 1.16984          | 2.24987     | KCNIP1                                                | 1.04246          | 2.05974     |
| FAM211B    | 1.24744          | 2.37420     | EPPK1      | 1.17221          | 2.25357     | DSG2                                                  | 1.04346          | 2.06117     |
| PTPRN      | 1.25283          | 2.38308     | SNTA1      | 1.17226          | 2.25364     | SRXN1                                                 | 1.04476          | 2.06302     |
| IMPA2      | 1.25931          | 2.39381     | XBP1       | 1.17591          | 2.25935     | RBFOX3                                                | 1.04544          | 2.06400     |
| PLP2       | 1.26143          | 2.39733     | YARS       | 1.17868          | 2.26370     | PPDPF                                                 | 1.04908          | 2.06921     |
| ATP4A      | 1.27991          | 2.42824     | SOWAHA     | 1.18052          | 2.26658     | SLC6A16                                               | 1.04951          | 2.06983     |
| EML2       | 1.28125          | 2.43049     | SYT7       | 1.18395          | 2.27198     | ZNF449                                                | 1.05168          | 2.07294     |
| AARS       | 1.28822          | 2.44227     | GLT25D2    | 1.18622          | 2.27556     | RARA                                                  | 1.05235          | 2.07391     |
| FAIM2      | 1.29059          | 2.44628     | FAM149A    | 1.18702          | 2.27682     | GIPC3                                                 | 1.06257          | 2.08865     |
| HSD17B14   | 1.29777          | 2.45849     | DOC2B      | 1.18906          | 2.28004     | ZNF702P                                               | 1.06267          | 2.08879     |
| H1FO       | 1.29843          | 2.45961     | BAIAP2-AS1 | 1.19273          | 2.28585     | HRC                                                   | 1.06356          | 2.09008     |
| KCNH6      | 1.30443          | 2.46986     | FAM46C     | 1.19807          | 2.29433     | GPRC5C                                                | 1.06825          | 2.09689     |
| RILPL1     | 1.30472          | 2.47036     | KIAA1161   | 1.20194          | 2.30049     | TBC1D16                                               | 1.07115          | 2.10111     |
| SPINT2     | 1.30651          | 2.47342     | TNFAIP2    | 1.20451          | 2.30459     | EPOR                                                  | 1.07274          | 2.10342     |
| CECR1      | 1.30657          | 2.47353     | RPS27      | 1.20728          | 2.30902     | CCDC8                                                 | 1.08812          | 2.12597     |
| CLDN6      | 1.30974          | 2.47897     | DUSP5      | 1.20799          | 2.31016     | PHLDB3                                                | 1.08915          | 2.12749     |
| PYCR1      | 1.31318          | 2.48489     | EXOC3L1    | 1.21257          | 2.31750     | TNFRSF10D                                             | 1.08934          | 2.12777     |
| CAMKK1     | 1.31444          | 2.48706     | CTSL1      | 1.21952          | 2.32869     | TH                                                    | 1.09008          | 2.12886     |
| PLEKHA4    | 1.32414          | 2.50384     | FAM78A     | 1.22333          | 2.33485     | KLF16                                                 | 1.09094          | 2.13013     |
| GAS5       | 1.32672          | 2.50832     | XPOT       | 1.22682          | 2.34051     | RAB11FIP1                                             | 1.09111          | 2.13038     |
| CHCHD10    | 1.32706          | 2.50891     | TTYH2      | 1.23008          | 2.34580     | SYT3                                                  | 1.09282          | 2.13291     |
| CBX4       | 1.32832          | 2.51110     | KCNT1      | 1.23072          | 2.34684     | ARL4C                                                 | 1.09846          | 2.14126     |
| P2RX2      | 1.32907          | 2.51241     | OGFRL1     | 1.23426          | 2.35261     | MGMT                                                  | 1.10303          | 2.14805     |
| PANX2      | 1.35109          | 2.55105     | CDS1       | 1.23438          | 2.35280     | QSOX2                                                 | 1.10669          | 2.15351     |
| TH         | 1.35339          | 2.55512     | S100A6     | 1.23555          | 2.35471     | CRB2                                                  | 1.11135          | 2.16048     |



| 24 h       |                  |             | 36 h       |                  |             | 48 h       |                  |             |
|------------|------------------|-------------|------------|------------------|-------------|------------|------------------|-------------|
| Gene names | log2 fold change | fold change | Gene names | log2 fold change | fold change | Gene names | log2 fold change | fold change |
| PKD1       | 1.35763          | 2.56264     | TNFRSF10B  | 1.23747          | 2.35785     | HK2        | 1.11733          | 2.16945     |
| GNG7       | 1.36057          | 2.56787     | PANX2      | 1.23884          | 2.36009     | GIPR       | 1.11846          | 2.17115     |
| SLC7A1     | 1.36692          | 2.57919     | PPAPDC3    | 1.23992          | 2.36185     | GPR3       | 1.12054          | 2.17428     |
| LLGL2      | 1.37573          | 2.59499     | PDLIM3     | 1.25324          | 2.38376     | KIAA1644   | 1.12177          | 2.17614     |
| MAL        | 1.37921          | 2.60126     | SH3BP4     | 1.25666          | 2.38942     | APLNR      | 1.12297          | 2.17795     |
| RFPL4B     | 1.38178          | 2.60590     | RYP1       | 1.25695          | 2.38990     | PPL        | 1.12592          | 2.18241     |
| METRNL     | 1.39619          | 2.63206     | FMNL1      | 1.25801          | 2.39166     | RBPMS2     | 1.12873          | 2.18666     |
| PPP1R1A    | 1.40393          | 2.64621     | GAS6       | 1.25827          | 2.39209     | GADD45G    | 1.12994          | 2.18850     |
| SLC32A1    | 1.40665          | 2.65121     | EML2       | 1.25845          | 2.39239     | PCYT2      | 1.13115          | 2.19033     |
| LOXL4      | 1.40801          | 2.65371     | MYL1       | 1.25927          | 2.39375     | HLA-E      | 1.13152          | 2.19089     |
| SLC29A1    | 1.40817          | 2.65400     | COL18A1    | 1.26016          | 2.39522     | GAS5       | 1.13317          | 2.19340     |
| PCBD1      | 1.42349          | 2.68234     | HEBP1      | 1.26163          | 2.39766     | MYL1       | 1.13396          | 2.19460     |
| FOXO6      | 1.42602          | 2.68704     | GAS5       | 1.27595          | 2.42158     | KCNK6      | 1.13415          | 2.19489     |
| TRAF5      | 1.42761          | 2.69001     | SHD        | 1.27635          | 2.42225     | AR         | 1.13592          | 2.19759     |
| TMEM190    | 1.43261          | 2.69935     | SERPINB6   | 1.27966          | 2.42782     | HES7       | 1.15534          | 2.22737     |
| TMEM176A   | 1.43598          | 2.70566     | ME1        | 1.28676          | 2.43980     | DOCK6      | 1.15559          | 2.22775     |
| FAM163B    | 1.44457          | 2.72182     | SLC1A4     | 1.28796          | 2.44183     | C1orf115   | 1.15578          | 2.22805     |
| CD248      | 1.44834          | 2.72894     | CLEC4G     | 1.28967          | 2.44472     | OGFRL1     | 1.15912          | 2.23321     |
| CPT1A      | 1.45571          | 2.74292     | AHNAK2     | 1.29097          | 2.44693     | PLIN3      | 1.16331          | 2.23971     |
| ISLR       | 1.46097          | 2.75293     | SLC7A1     | 1.29263          | 2.44974     | ME1        | 1.17904          | 2.26426     |
| IQCA1      | 1.46417          | 2.75905     | RILPL1     | 1.29534          | 2.45435     | GTPBP2     | 1.18037          | 2.26635     |
| RD3        | 1.47092          | 2.77199     | DUSP5P     | 1.30195          | 2.46562     | B3GNT2     | 1.18094          | 2.26724     |
| ATHL1      | 1.48176          | 2.79289     | H1FO       | 1.31722          | 2.49185     | GALK1      | 1.18127          | 2.26776     |
| LGALS3BP   | 1.48411          | 2.79745     | GAL        | 1.32558          | 2.50634     | TAGLN2     | 1.18687          | 2.27658     |
| C20orf195  | 1.50064          | 2.82968     | TRIM72     | 1.32644          | 2.50783     | NTSR1      | 1.18863          | 2.27936     |
| INF2       | 1.50223          | 2.83280     | METRNL     | 1.32728          | 2.50929     | PLA2G3     | 1.18973          | 2.28110     |
| FCGRT      | 1.50627          | 2.84075     | ANKRD24    | 1.32741          | 2.50952     | RAB11FIP4  | 1.19131          | 2.28360     |
| CARD14     | 1.50892          | 2.84597     | ATP2A3     | 1.33319          | 2.51959     | NPTX2      | 1.19507          | 2.28956     |
| PSPH       | 1.51091          | 2.84990     | IGHD       | 1.34824          | 2.54601     | SHISA2     | 1.19676          | 2.29224     |
| HMOX1      | 1.53115          | 2.89016     | GARS       | 1.36203          | 2.57047     | GRIN2D     | 1.19818          | 2.29450     |
| LINC00086  | 1.54867          | 2.92547     | PLP2       | 1.36263          | 2.57154     | NRTN       | 1.19896          | 2.29574     |
| C21orf54   | 1.56862          | 2.96621     | FOXO6      | 1.36349          | 2.57307     | GARS       | 1.20165          | 2.30003     |
| DNASE2     | 1.57115          | 2.97141     | FLNC       | 1.36672          | 2.57884     | SRL        | 1.20262          | 2.30157     |
| ALDH1L2    | 1.57204          | 2.97325     | MAPK15     | 1.36835          | 2.58175     | FAM78A     | 1.20307          | 2.30229     |
| CCR7       | 1.58583          | 3.00180     | LOXL4      | 1.37242          | 2.58904     | HCN2       | 1.20492          | 2.30524     |
| CDK18      | 1.58859          | 3.00755     | FABP3      | 1.37328          | 2.59059     | DOC2B      | 1.21115          | 2.31522     |
| NINJ1      | 1.59331          | 3.01741     | SLC16A3    | 1.38075          | 2.60404     | IL13RA1    | 1.21218          | 2.31687     |
| C11orf96   | 1.59587          | 3.02277     | KREMEN1    | 1.38442          | 2.61067     | N4BP3      | 1.21687          | 2.32442     |
| SEZ6       | 1.60117          | 3.03389     | SYNGR2     | 1.38746          | 2.61618     | LITAF      | 1.21698          | 2.32460     |
| COX6B2     | 1.60675          | 3.04565     | FAIM2      | 1.39344          | 2.62704     | DIRAS1     | 1.21851          | 2.32706     |
| DBH-AS1    | 1.61345          | 3.05983     | IFITM1     | 1.39351          | 2.62717     | PPARGC1B   | 1.21945          | 2.32858     |
| BAI2       | 1.61976          | 3.07324     | CLDN5      | 1.39402          | 2.62810     | SCPEP1     | 1.22211          | 2.33288     |
| ZFP36      | 1.62164          | 3.07725     | SCN4A      | 1.40593          | 2.64989     | KIAA1161   | 1.22247          | 2.33346     |
| RPL18P13   | 1.64061          | 3.11798     | LLGL2      | 1.40948          | 2.65641     | APCDD1     | 1.22427          | 2.33637     |
| MAP4K2     | 1.64263          | 3.12235     | TMEM132E   | 1.42267          | 2.68081     | CHST1      | 1.22755          | 2.34169     |
| FAM83G     | 1.64707          | 3.13197     | AK4        | 1.43221          | 2.69860     | UBTD1      | 1.23441          | 2.35285     |

| 24 h       |                  |             | 36 h       |                  |             | 48 h       |                  |             |
|------------|------------------|-------------|------------|------------------|-------------|------------|------------------|-------------|
| Gene names | log2 fold change | fold change | Gene names | log2 fold change | fold change | Gene names | log2 fold change | fold change |
| EGFL7      | 1.65106          | 3.14064     | NID1       | 1.43702          | 2.70761     | ARL4D      | 1.23467          | 2.35328     |
| TMC6       | 1.65195          | 3.14258     | WSCD1      | 1.43866          | 2.71069     | GAS2L1     | 1.23881          | 2.36004     |
| PMAIP1     | 1.65661          | 3.15275     | CBX4       | 1.44384          | 2.72044     | PMEL       | 1.24184          | 2.36500     |
| MTHFD2     | 1.66633          | 3.17406     | ALDH1L2    | 1.44394          | 2.72063     | ROBO3      | 1.24561          | 2.37119     |
| PHLDA3     | 1.66639          | 3.17419     | HSD17B14   | 1.44922          | 2.73060     | KLHDC8A    | 1.24616          | 2.37209     |
| FGF17      | 1.67814          | 3.20015     | IMPA2      | 1.45164          | 2.73519     | GPR37      | 1.24867          | 2.37622     |
| MFAP4      | 1.67955          | 3.20328     | HMOX1      | 1.46698          | 2.76443     | BOK        | 1.25554          | 2.38756     |
| ANXA11     | 1.68103          | 3.20657     | ISG15      | 1.47351          | 2.77697     | GAL        | 1.25648          | 2.38912     |
| FAM71E2    | 1.68247          | 3.20977     | RFPL4B     | 1.48722          | 2.80348     | STXBP2     | 1.25655          | 2.38924     |
| SH2B3      | 1.68597          | 3.21757     | HBQ1       | 1.49329          | 2.81530     | IRAK1      | 1.26026          | 2.39539     |
| UAP1L1     | 1.70072          | 3.25063     | EMP3       | 1.49332          | 2.81536     | SNTA1      | 1.26028          | 2.39542     |
| PRKCD      | 1.70197          | 3.25345     | PIR        | 1.49351          | 2.81573     | SHD        | 1.26597          | 2.40489     |
| TUSC5      | 1.71758          | 3.28884     | KIF19      | 1.49364          | 2.81599     | PHYHIP     | 1.26975          | 2.41120     |
| ANKRD9     | 1.72007          | 3.29452     | CHCHD10    | 1.51849          | 2.86491     | C21orf77   | 1.27971          | 2.42790     |
| GPR142     | 1.72409          | 3.30372     | SLC29A1    | 1.52057          | 2.86904     | CTSL1      | 1.28021          | 2.42874     |
| CTH        | 1.72671          | 3.30972     | ZNF204P    | 1.52345          | 2.87478     | SMTNL2     | 1.28199          | 2.43174     |
| ASNS       | 1.73356          | 3.32547     | PCBD1      | 1.52804          | 2.88394     | B4GALNT3   | 1.28604          | 2.43858     |
| PALM3      | 1.75187          | 3.36795     | PLEKHA4    | 1.53342          | 2.89471     | SH3RF3     | 1.28665          | 2.43961     |
| EIF4EBP1   | 1.76126          | 3.38994     | SLC32A1    | 1.53501          | 2.89790     | PSPH       | 1.29339          | 2.45103     |
| RHBDF1     | 1.76445          | 3.39744     | TRAF5      | 1.53748          | 2.90287     | CAMKK1     | 1.29445          | 2.45283     |
| TSC22D3    | 1.78046          | 3.43536     | SPINT2     | 1.53804          | 2.90400     | PLP2       | 1.29552          | 2.45465     |
| IGHD       | 1.79346          | 3.46645     | GNG7       | 1.54147          | 2.91091     | PHGDH      | 1.29663          | 2.45654     |
| PHGDH      | 1.79528          | 3.47083     | CCR7       | 1.55712          | 2.94266     | DUSP5      | 1.29762          | 2.45823     |
| ASS1P9     | 1.81736          | 3.52436     | DBH-AS1    | 1.55893          | 2.94635     | TSPAN15    | 1.30059          | 2.46330     |
| SSTR3      | 1.82647          | 3.54668     | SYPL2      | 1.56554          | 2.95988     | PANX2      | 1.30516          | 2.47111     |
| RENBP      | 1.83407          | 3.56541     | ZFP36      | 1.56686          | 2.96259     | RAMP2      | 1.31049          | 2.48026     |
| CNN2       | 1.84385          | 3.58967     | NINJ1      | 1.57338          | 2.97601     | C1orf233   | 1.31428          | 2.48678     |
| FAM131C    | 1.85972          | 3.62937     | KLF9       | 1.57874          | 2.98709     | AVPI1      | 1.31543          | 2.48876     |
| KCNJ5      | 1.86202          | 3.63516     | RD3        | 1.58169          | 2.99320     | SYT7       | 1.31911          | 2.49512     |
| DDIT4      | 1.86415          | 3.64053     | GFPT2      | 1.58514          | 3.00037     | FAM46C     | 1.31915          | 2.49519     |
| SLC3A2     | 1.87323          | 3.66352     | EIF4EBP1   | 1.60286          | 3.03745     | FAIM2      | 1.32388          | 2.50338     |
| SESN2      | 1.87641          | 3.67160     | RRAS       | 1.60996          | 3.05243     | TNFAIP2    | 1.32626          | 2.50752     |
| GPT2       | 1.89126          | 3.70959     | CD248      | 1.61001          | 3.05254     | SH3BP4     | 1.33141          | 2.51649     |
| SYNPO      | 1.91914          | 3.78198     | PHGDH      | 1.61254          | 3.05790     | RHPN2      | 1.33271          | 2.51875     |
| PSAT1      | 1.93126          | 3.81388     | PLCB2      | 1.61358          | 3.06010     | ARID5A     | 1.33381          | 2.52067     |
| SLC16A14   | 1.93429          | 3.82190     | P2RX2      | 1.61831          | 3.07015     | NOXA1      | 1.33896          | 2.52969     |
| TMEM52     | 1.96602          | 3.90689     | PSPH       | 1.63701          | 3.11021     | MTHFD2     | 1.34102          | 2.53330     |
| NQO1       | 1.96878          | 3.91437     | C11orf96   | 1.63925          | 3.11504     | PADI2      | 1.34166          | 2.53443     |
| RREB1      | 1.96937          | 3.91597     | MTHFD2     | 1.64445          | 3.12629     | FMNL1      | 1.34287          | 2.53655     |
| CHRND      | 1.98158          | 3.94925     | SH2B3      | 1.65978          | 3.15968     | EML2       | 1.35169          | 2.55211     |
| NKD2       | 1.99015          | 3.97278     | RHOV       | 1.66173          | 3.16396     | EIF4EBP1   | 1.35451          | 2.55710     |
| TSPO       | 1.99044          | 3.97358     | PPP1R1A    | 1.66362          | 3.16810     | SLC12A4    | 1.35463          | 2.55732     |
| PTPRH      | 1.99363          | 3.98238     | IQCA1      | 1.66862          | 3.17910     | GLT25D2    | 1.35761          | 2.56260     |
| KCNK3      | 1.99531          | 3.98702     | C20orf195  | 1.67189          | 3.18632     | PPAPDC3    | 1.35847          | 2.56413     |
| NPAS1      | 2.00919          | 4.02556     | ASNS       | 1.67748          | 3.19869     | ICAM5      | 1.36046          | 2.56767     |
| MRC2       | 2.01471          | 4.04099     | INF2       | 1.68011          | 3.20452     | AEBP1      | 1.37348          | 2.59095     |



| 24 h       |                  |             | 36 h       |                  |             | 48 h       |                  |             |
|------------|------------------|-------------|------------|------------------|-------------|------------|------------------|-------------|
| Gene names | log2 fold change | fold change | Gene names | log2 fold change | fold change | Gene names | log2 fold change | fold change |
| SLC12A7    | 2.03046          | 4.08535     | FAM131C    | 1.68072          | 3.20588     | ZBTB42     | 1.38241          | 2.60704     |
| CPLX3      | 2.04945          | 4.13948     | LINC00086  | 1.68323          | 3.21146     | TNNI1      | 1.38708          | 2.61549     |
| NHLH1      | 2.05572          | 4.15751     | SLC16A14   | 1.69623          | 3.24053     | RHPN1-AS1  | 1.39001          | 2.62080     |
| NR4A1      | 2.08392          | 4.23958     | GPT2       | 1.70655          | 3.26379     | NEUROD4    | 1.39045          | 2.62160     |
| SERPINF1   | 2.12596          | 4.36493     | MAL        | 1.70751          | 3.26597     | HMOX1      | 1.39852          | 2.63631     |
| RGS16      | 2.12695          | 4.36793     | CPNE2      | 1.71026          | 3.27220     | SYT2       | 1.40608          | 2.65016     |
| DDIT3      | 2.16534          | 4.48572     | COL9A2     | 1.72214          | 3.29925     | FLNC       | 1.40942          | 2.65630     |
| TSHZ3      | 2.17587          | 4.51858     | EGFL7      | 1.72254          | 3.30017     | PCBD1      | 1.40997          | 2.65732     |
| ECEL1      | 2.18225          | 4.53861     | TUSC5      | 1.72271          | 3.30056     | PDLIM3     | 1.41388          | 2.66453     |
| SLC6A17    | 2.21747          | 4.65077     | PMAIP1     | 1.73394          | 3.32635     | S100A6     | 1.41621          | 2.66883     |
| VEGFA      | 2.22587          | 4.67793     | LGALS3BP   | 1.73504          | 3.32889     | H1FO       | 1.41936          | 2.67467     |
| ASS1P7     | 2.24249          | 4.73213     | DNASE2     | 1.73948          | 3.33915     | METRNL     | 1.41956          | 2.67504     |
| KCNQ1      | 2.27494          | 4.83978     | MFAP4      | 1.75075          | 3.36533     | BAIAP2-AS1 | 1.42416          | 2.68358     |
| C19orf66   | 2.29513          | 4.90798     | RHBDF1     | 1.75813          | 3.38259     | HSD17B14   | 1.43078          | 2.69592     |
| TRPV2      | 2.31893          | 4.98962     | ATHL1      | 1.76528          | 3.39940     | PMAIP1     | 1.43367          | 2.70133     |
| AGT        | 2.34252          | 5.07188     | KCNH6      | 1.76624          | 3.40166     | CBX4       | 1.43445          | 2.70279     |
| AMBP       | 2.41753          | 5.34256     | KCNJ4      | 1.77449          | 3.42117     | C5orf65    | 1.44596          | 2.72444     |
| ASS1P11    | 2.43305          | 5.40034     | CHRND      | 1.77681          | 3.42668     | IFITM1     | 1.45613          | 2.74371     |
| ELFN2      | 2.43715          | 5.41571     | SESN2      | 1.78406          | 3.44394     | SLCO4C1    | 1.46504          | 2.76071     |
| PTGIR      | 2.46542          | 5.52288     | PSAT1P3    | 1.79301          | 3.46537     | SIT1       | 1.46627          | 2.76307     |
| GABRD      | 2.48174          | 5.58571     | TMEM176A   | 1.79368          | 3.46698     | SGPP2      | 1.47186          | 2.77379     |
| ASS1       | 2.50775          | 5.68732     | FCGRT      | 1.80102          | 3.48467     | NMB        | 1.48307          | 2.79543     |
| C20orf26   | 2.54707          | 5.84446     | QPCT       | 1.80846          | 3.50268     | ZNF600     | 1.48323          | 2.79574     |
| ATF3       | 2.59503          | 6.04202     | FAM83G     | 1.81388          | 3.51587     | FOXO6      | 1.48399          | 2.79721     |
| ULBP1      | 2.61896          | 6.14307     | NACC2      | 1.81718          | 3.52392     | COL18A1    | 1.49284          | 2.81442     |
| PDE10A     | 2.62275          | 6.15923     | UAP1L1     | 1.82761          | 3.54949     | ABHD15     | 1.49441          | 2.81749     |
| SRCRB4D    | 2.69473          | 6.47433     | PRKCD      | 1.84624          | 3.59562     | ATP2A3     | 1.49752          | 2.82357     |
| SLC7A5     | 2.70024          | 6.49910     | SLC3A2     | 1.87339          | 3.66393     | RHBDF2     | 1.49838          | 2.82525     |
| TNS1       | 2.70882          | 6.53787     | KLK1       | 1.88406          | 3.69112     | ASNS       | 1.50083          | 2.83005     |
| KLF15      | 2.75003          | 6.72731     | CPT1A      | 1.90043          | 3.73324     | GAS6       | 1.50491          | 2.83807     |
| EFHD1      | 2.79888          | 6.95900     | PALM3      | 1.90491          | 3.74486     | PIR        | 1.51769          | 2.86332     |
| AKNA       | 2.88267          | 7.37514     | NR4A1      | 1.90573          | 3.74698     | TTYH2      | 1.51863          | 2.86519     |
| CHAC1      | 2.95307          | 7.74395     | TSC22D3    | 1.93204          | 3.81594     | SESN2      | 1.52185          | 2.87159     |
| TRIB3      | 3.00115          | 8.00638     | EPHA2      | 1.93753          | 3.83049     | SH2B3      | 1.52255          | 2.87298     |
| FGF19      | 3.14917          | 8.87145     | SHMT2      | 1.95049          | 3.86506     | CCR7       | 1.52344          | 2.87476     |
| DDR2       | 3.17641          | 9.04055     | SEZ6       | 1.95704          | 3.88265     | GPT2       | 1.53102          | 2.88990     |
| RPL18P11   | 3.30351          | 9.87315     | SCARF1     | 1.98835          | 3.96783     | CHCHD10    | 1.53457          | 2.89702     |
| SLC16A6    | 3.38637          | 10.45680    | SPOCK2     | 1.99031          | 3.97322     | EPDR1      | 1.53611          | 2.90011     |
| GDF15      | 3.42196          | 10.71797    | C21orf54   | 2.03243          | 4.09093     | S100A4     | 1.53874          | 2.90541     |
| CDC42EP1   | 3.52807          | 11.53599    | CLDN6      | 2.04044          | 4.11371     | FABP3      | 1.54018          | 2.90831     |
| INHBE      | 3.53392          | 11.58286    | ECEL1      | 2.04166          | 4.11719     | ZNF204P    | 1.54026          | 2.90847     |
| ATF5       | 3.64119          | 12.47692    | ANXA11     | 2.04512          | 4.12708     | WSCD1      | 1.54935          | 2.92685     |
| CEBPB      | 3.80628          | 13.98957    | NQO1       | 2.06382          | 4.18092     | CCDC155    | 1.57887          | 2.98736     |
| STC2       | 3.84981          | 14.41811    | NHLH1      | 2.07226          | 4.20545     | BDKRB2     | 1.58103          | 2.99183     |
| ADM2       | 3.91178          | 15.05092    | CNN2       | 2.07294          | 4.20743     | AIF1L      | 1.58361          | 2.99719     |
| PCK2       | 3.93925          | 15.34025    | SYNPO      | 2.07722          | 4.21993     | RD3        | 1.58376          | 2.99750     |

| 24 h       |                  |             |
|------------|------------------|-------------|
| Gene names | log2 fold change | fold change |
| TRIM66     | 4.10317          | 17.18610    |
| SLC7A3     | 4.42116          | 21.42406    |
| P2RX1      | 4.61411          | 24.48982    |
| MIOX       | 4.69223          | 25.85247    |
| JDP2       | 4.69829          | 25.96129    |
| UNC5B      | 4.89681          | 29.79111    |
| SLC7A11    | 5.21444          | 37.12811    |

| 36 h       |                  |             |
|------------|------------------|-------------|
| Gene names | log2 fold change | fold change |
| DDIT4      | 2.08973          | 4.25668     |
| COX6B2     | 2.09087          | 4.26005     |
| KCNJ5      | 2.10595          | 4.30481     |
| NPAS1      | 2.11092          | 4.31967     |
| BLVRB      | 2.13245          | 4.38461     |
| GPR142     | 2.14357          | 4.41854     |
| SH3KBP1    | 2.14805          | 4.43228     |
| RGS16      | 2.16793          | 4.49378     |
| TMEM52     | 2.21224          | 4.63394     |
| SSTR3      | 2.21226          | 4.63401     |
| TMC6       | 2.21643          | 4.64742     |
| TSHZ3      | 2.22816          | 4.68536     |
| PLXND1     | 2.23531          | 4.70864     |
| DDIT3      | 2.27501          | 4.84001     |
| TICAM1     | 2.28497          | 4.87354     |
| MRC2       | 2.29687          | 4.91391     |
| ASS1P9     | 2.32711          | 5.01799     |
| FOXS1      | 2.33291          | 5.03821     |
| KCNK3      | 2.33983          | 5.06243     |
| PTPRH      | 2.34318          | 5.07420     |
| SERPINF1   | 2.36921          | 5.16658     |
| KLF15      | 2.39114          | 5.24572     |
| A4GALT     | 2.39738          | 5.26846     |
| VEGFA      | 2.41039          | 5.31618     |
| ELFN2      | 2.44699          | 5.45277     |
| ULBP1      | 2.44742          | 5.45440     |
| ASS1       | 2.45045          | 5.46587     |
| ADRA2B     | 2.45296          | 5.47538     |
| SLC6A17    | 2.48516          | 5.59896     |
| TSPO       | 2.51172          | 5.70300     |
| CPLX3      | 2.53348          | 5.78967     |
| CREB3L1    | 2.59919          | 6.05946     |
| TNS1       | 2.60817          | 6.09730     |
| ATF3       | 2.63674          | 6.21925     |
| SBK2       | 2.75138          | 6.73361     |
| SLC7A5     | 2.76072          | 6.77734     |
| AGT        | 2.79726          | 6.95119     |
| PTGIR      | 2.82218          | 7.07230     |
| AMBP       | 2.83434          | 7.13216     |
| TRPV2      | 2.88961          | 7.41070     |
| AKNA       | 2.91475          | 7.54097     |
| CLDN4      | 2.92778          | 7.60939     |
| C19orf66   | 2.98757          | 7.93137     |
| HCK        | 3.02361          | 8.13200     |
| TRIB3      | 3.10669          | 8.61404     |
| MOCOS      | 3.12816          | 8.74319     |

| 48 h       |                  |             |
|------------|------------------|-------------|
| Gene names | log2 fold change | fold change |
| GNG7       | 1.58496          | 2.99999     |
| ANKRD24    | 1.59128          | 3.01317     |
| PHLDA3     | 1.59373          | 3.01829     |
| SIX3       | 1.61275          | 3.05834     |
| GFPT2      | 1.61643          | 3.06615     |
| SYPL2      | 1.61769          | 3.06883     |
| CACNG5     | 1.62429          | 3.08290     |
| NQO1       | 1.63248          | 3.10046     |
| KCNT1      | 1.63295          | 3.10147     |
| CLEC4G     | 1.63703          | 3.11025     |
| TNNI3      | 1.64688          | 3.13156     |
| LOXL4      | 1.65438          | 3.14788     |
| PLEKHA4    | 1.65672          | 3.15299     |
| PSAT1      | 1.66471          | 3.17050     |
| CPNE2      | 1.66485          | 3.17081     |
| LLGL2      | 1.66815          | 3.17807     |
| MFAP4      | 1.67325          | 3.18932     |
| C11orf96   | 1.67548          | 3.19426     |
| MPO        | 1.67671          | 3.19698     |
| SLC29A1    | 1.67973          | 3.20368     |
| PLCB2      | 1.68718          | 3.22027     |
| IMPA2      | 1.68732          | 3.22058     |
| TRIM72     | 1.68974          | 3.22599     |
| DBH-AS1    | 1.69807          | 3.24467     |
| FAM131C    | 1.70206          | 3.25365     |
| DNASE2     | 1.71724          | 3.28807     |
| TMEM132E   | 1.71873          | 3.29147     |
| SOWAHA     | 1.72313          | 3.30152     |
| AK4        | 1.72632          | 3.30883     |
| PALD1      | 1.72761          | 3.31179     |
| SLC3A2     | 1.73169          | 3.32117     |
| SPINT2     | 1.73199          | 3.32186     |
| NID1       | 1.74575          | 3.35369     |
| EMP3       | 1.74577          | 3.35374     |
| MYO1D      | 1.75756          | 3.38126     |
| AXL        | 1.76959          | 3.40957     |
| BCAM       | 1.77412          | 3.42029     |
| NEUROD2    | 1.78017          | 3.43467     |
| RYR1       | 1.78391          | 3.44358     |
| EPPK1      | 1.80591          | 3.49650     |
| TSC22D3    | 1.80756          | 3.50050     |
| HBQ1       | 1.80973          | 3.50577     |
| ANKRD9     | 1.82054          | 3.53213     |
| FAM163B    | 1.82183          | 3.53529     |
| INF2       | 1.82632          | 3.54631     |
| CD248      | 1.84156          | 3.58397     |

| 24 h       |                  |             | 36 h       |                  |             | 48 h       |                  |             |
|------------|------------------|-------------|------------|------------------|-------------|------------|------------------|-------------|
| Gene names | log2 fold change | fold change | Gene names | log2 fold change | fold change | Gene names | log2 fold change | fold change |
|            |                  |             | C20orf26   | 3.13366          | 8.77659     | RRAS       | 1.84614          | 3.59537     |
|            |                  |             | CLDN3      | 3.22286          | 9.33636     | SLC16A3    | 1.84765          | 3.59913     |
|            |                  |             | SRCRB4D    | 3.28978          | 9.77963     | RILP       | 1.85901          | 3.62759     |
|            |                  |             | EFHD1      | 3.31152          | 9.92812     | SLC9A5     | 1.88063          | 3.68236     |
|            |                  |             | GDF15      | 3.36644          | 10.31334    | TMEM176B   | 1.88137          | 3.68425     |
|            |                  |             | DDR2       | 3.37525          | 10.37651    | KCNJ4      | 1.88752          | 3.69999     |
|            |                  |             | INHBE      | 3.37807          | 10.39682    | ISG15      | 1.89473          | 3.71852     |
|            |                  |             | GABRD      | 3.38783          | 10.46739    | CDK18      | 1.89526          | 3.71989     |
|            |                  |             | SLC16A6    | 3.51215          | 11.40939    | QPCT       | 1.89807          | 3.72714     |
|            |                  |             | ATF5       | 3.68873          | 12.89491    | KISS1      | 1.90167          | 3.73645     |
|            |                  |             | ADM2       | 3.72819          | 13.25248    | TUSC5      | 1.93427          | 3.82185     |
|            |                  |             | TBXA2R     | 3.72933          | 13.26295    | MAPK15     | 1.93439          | 3.82216     |
|            |                  |             | CDC42EP1   | 3.73692          | 13.33291    | CLDN5      | 1.94507          | 3.85056     |
|            |                  |             | CEBPB      | 3.76414          | 13.58686    | AHNAK2     | 1.94736          | 3.85668     |
|            |                  |             | CHST3      | 3.77015          | 13.64358    | KLF9       | 1.95168          | 3.86825     |
|            |                  |             | STC2       | 3.85904          | 14.51065    | CHRND      | 1.95707          | 3.88273     |
|            |                  |             | PCK2       | 3.92436          | 15.18274    | CRYL1      | 1.96672          | 3.90878     |
|            |                  |             | TRIM66     | 4.05362          | 16.60585    | LGALS3BP   | 1.99422          | 3.98401     |
|            |                  |             | JDP2       | 4.51907          | 22.92850    | PALM3      | 2.00441          | 4.01225     |
|            |                  |             | MIOX       | 4.64133          | 24.95626    | SNCB       | 2.00569          | 4.01581     |
|            |                  |             | UNC5B      | 4.98093          | 31.57980    | CPT1A      | 2.00654          | 4.01817     |
|            |                  |             | P2RX1      | 4.98248          | 31.61374    | IQCA1      | 2.00783          | 4.02177     |
|            |                  |             | SLC7A11    | 5.25705          | 38.24104    | KLK1       | 2.02029          | 4.05665     |
|            |                  |             |            |                  |             | FCGRT      | 2.02325          | 4.06498     |
|            |                  |             |            |                  |             | P2RX2      | 2.02677          | 4.07492     |
|            |                  |             |            |                  |             | SCN4A      | 2.03011          | 4.08436     |
|            |                  |             |            |                  |             | MAP4K2     | 2.03621          | 4.10167     |
|            |                  |             |            |                  |             | NHLH1      | 2.04064          | 4.11428     |
|            |                  |             |            |                  |             | KIF19      | 2.04607          | 4.12979     |
|            |                  |             |            |                  |             | CPNE9      | 2.04673          | 4.13168     |
|            |                  |             |            |                  |             | FAM83G     | 2.04839          | 4.13644     |
|            |                  |             |            |                  |             | CXCR7      | 2.05356          | 4.15129     |
|            |                  |             |            |                  |             | RBM24      | 2.06734          | 4.19113     |
|            |                  |             |            |                  |             | RGS16      | 2.06783          | 4.19256     |
|            |                  |             |            |                  |             | ECEL1      | 2.06826          | 4.19381     |
|            |                  |             |            |                  |             | PRKCD      | 2.06934          | 4.19695     |
|            |                  |             |            |                  |             | ITGA2B     | 2.07281          | 4.20705     |
|            |                  |             |            |                  |             | TMEM176A   | 2.09093          | 4.26023     |
|            |                  |             |            |                  |             | ADAM33     | 2.09411          | 4.26963     |
|            |                  |             |            |                  |             | USH1G      | 2.09822          | 4.28181     |
|            |                  |             |            |                  |             | PRAME      | 2.09887          | 4.28374     |
|            |                  |             |            |                  |             | SPOCK2     | 2.11687          | 4.33752     |
|            |                  |             |            |                  |             | NKD2       | 2.12001          | 4.34697     |
|            |                  |             |            |                  |             | ATHL1      | 2.12377          | 4.35831     |
|            |                  |             |            |                  |             | TMEM190    | 2.13251          | 4.38480     |
|            |                  |             |            |                  |             | EGFL7      | 2.14075          | 4.40991     |



| 24 h       |                  |             |
|------------|------------------|-------------|
| Gene names | log2 fold change | fold change |

| 36 h       |                  |             |
|------------|------------------|-------------|
| Gene names | log2 fold change | fold change |

| 48 h       |                  |             |
|------------|------------------|-------------|
| Gene names | log2 fold change | fold change |
| UAP1L1     | 2.15803          | 4.46305     |
| MAL        | 2.16383          | 4.48103     |
| EPHA2      | 2.17611          | 4.51933     |
| ASS1P9     | 2.18543          | 4.54862     |
| COL9A2     | 2.20105          | 4.59814     |
| C21orf54   | 2.20645          | 4.61538     |
| SEZ6       | 2.21639          | 4.64729     |
| NACC2      | 2.21776          | 4.65171     |
| RHBDF1     | 2.22029          | 4.65987     |
| KCNH6      | 2.22233          | 4.66646     |
| DDIT3      | 2.22548          | 4.67666     |
| ANXA11     | 2.23145          | 4.69606     |
| SSTR3      | 2.24583          | 4.74310     |
| CFC1       | 2.24953          | 4.75528     |
| GMPR       | 2.27919          | 4.85405     |
| ASS1P11    | 2.29095          | 4.89378     |
| RAC2       | 2.33526          | 5.04642     |
| ISLR       | 2.34135          | 5.06777     |
| ASS1P7     | 2.34344          | 5.07511     |
| TNFRSF1B   | 2.34719          | 5.08832     |
| NPAS1      | 2.34719          | 5.08832     |
| ATF3       | 2.36702          | 5.15874     |
| FAM71E2    | 2.39745          | 5.26871     |
| PTPRH      | 2.40524          | 5.29724     |
| BLVRB      | 2.42525          | 5.37122     |
| CA4        | 2.42614          | 5.37454     |
| CNN2       | 2.43443          | 5.40551     |
| KCNK3      | 2.43793          | 5.41864     |
| TMEM52     | 2.44479          | 5.44446     |
| PLXND1     | 2.49594          | 5.64096     |
| SYNPO      | 2.50535          | 5.67787     |
| AMBP       | 2.54369          | 5.83078     |
| TNS1       | 2.54462          | 5.83454     |
| TICAM1     | 2.58939          | 6.01844     |
| RREB1      | 2.61216          | 6.11418     |
| SLC7A5     | 2.61515          | 6.12687     |
| FUT1       | 2.64416          | 6.25132     |
| TMC6       | 2.67572          | 6.38958     |
| MRC2       | 2.68062          | 6.41131     |
| KLF15      | 2.68188          | 6.41692     |
| FOXS1      | 2.68604          | 6.43545     |
| CHAC1      | 2.69232          | 6.46352     |
| COX6B2     | 2.71095          | 6.54753     |
| ADRA2B     | 2.73015          | 6.63525     |
| A4GALT     | 2.73855          | 6.67399     |
| CLDN6      | 2.74265          | 6.69299     |

| 24 h       |                  |             |
|------------|------------------|-------------|
| Gene names | log2 fold change | fold change |

| 36 h       |                  |             |
|------------|------------------|-------------|
| Gene names | log2 fold change | fold change |

| 48 h       |                  |             |
|------------|------------------|-------------|
| Gene names | log2 fold change | fold change |
| PDE10A     | 2.85378          | 7.22892     |
| TSPO       | 2.85889          | 7.25457     |
| CREB3L1    | 2.89887          | 7.45842     |
| TRIB3      | 2.90119          | 7.47042     |
| AGT        | 2.92474          | 7.59337     |
| C8orf4     | 2.95919          | 7.77687     |
| CPLX3      | 2.98317          | 7.90722     |
| SLC16A6    | 2.99877          | 7.99318     |
| KCNQ1      | 3.05514          | 8.31168     |
| SBK2       | 3.06694          | 8.37994     |
| PTGIR      | 3.07609          | 8.43326     |
| INHBE      | 3.10218          | 8.58715     |
| ELFN2      | 3.12142          | 8.70244     |
| C20orf26   | 3.12255          | 8.70926     |
| GDF15      | 3.15249          | 8.89189     |
| IGSF21     | 3.20444          | 9.21791     |
| PRSS8      | 3.25052          | 9.51709     |
| FBXO27     | 3.25749          | 9.56318     |
| C19orf66   | 3.29823          | 9.83708     |
| EFHD1      | 3.36463          | 10.30041    |
| TRPV2      | 3.44489          | 10.88968    |
| CLDN4      | 3.47955          | 11.15447    |
| ATF5       | 3.49733          | 11.29279    |
| CEBPB      | 3.53446          | 11.58720    |
| FGF19      | 3.54439          | 11.66723    |
| ADM2       | 3.54569          | 11.67775    |
| STC2       | 3.60145          | 12.13793    |
| SRCRB4D    | 3.73787          | 13.34169    |
| HCK        | 3.74123          | 13.37280    |
| CLDN3      | 3.74254          | 13.38495    |
| TRIM66     | 3.83779          | 14.29848    |
| CDC42EP1   | 4.10273          | 17.18086    |
| GABRD      | 4.11708          | 17.35260    |
| JDP2       | 4.14007          | 17.63134    |
| RASD2      | 4.14351          | 17.67343    |
| TBXA2R     | 4.18509          | 18.19021    |
| CHST3      | 4.32111          | 19.98866    |
| C20orf203  | 4.43792          | 21.67440    |
| SLC7A3     | 4.57942          | 23.90797    |
| UNC5B      | 4.97408          | 31.43021    |
| SLC7A11    | 5.03688          | 32.82857    |
| P2RX1      | 5.07955          | 33.81403    |

| Cluster 1 (down-regulated genes)                                         |          | Cluster 2 (up-regulated genes)                                                    |          |
|--------------------------------------------------------------------------|----------|-----------------------------------------------------------------------------------|----------|
| GO term                                                                  | p-value  | GO term                                                                           | p-value  |
| protein-DNA complex subunit organization                                 | 1.99E-03 | hydrogen sulfide metabolic process                                                | 1.17E-03 |
| protein-DNA complex assembly                                             | 1.23E-03 | hydrogen sulfide biosynthetic process                                             | 1.17E-03 |
| growth                                                                   | 9.29E-04 | regulation of glucocorticoid metabolic process                                    | 8.91E-04 |
| mitotic cell cycle                                                       | 8.00E-08 | positive regulation of neuron death                                               | 8.39E-03 |
| organelle fission                                                        | 4.63E-05 | organic acid transport                                                            | 1.14E-03 |
| nuclear division                                                         | 2.37E-05 | anion transport                                                                   | 4.27E-03 |
| chromosome organization                                                  | 5.23E-09 | organic anion transport                                                           | 4.41E-03 |
| kinetochore organization                                                 | 1.79E-02 | carboxylic acid transport                                                         | 1.07E-03 |
| cell division                                                            | 1.55E-06 | amino acid transport                                                              | 1.73E-05 |
| chromosome segregation                                                   | 2.33E-08 | branched-chain amino acid transport                                               | 6.98E-03 |
| response to DNA damage stimulus                                          | 5.52E-03 | neutral amino acid transport                                                      | 1.79E-04 |
| cell cycle phase                                                         | 1.55E-07 | leucine transport                                                                 | 6.98E-03 |
| M phase                                                                  | 1.23E-05 | cellular response to biotic stimulus                                              | 5.76E-03 |
| M phase of mitotic cell cycle                                            | 3.13E-05 | response to unfolded protein                                                      | 1.71E-02 |
| interphase                                                               | 1.17E-04 | response to hormone stimulus                                                      | 5.85E-03 |
| interphase of mitotic cell cycle                                         | 7.88E-05 | response to organic nitrogen                                                      | 5.47E-04 |
| mitosis                                                                  | 2.37E-05 | response to amine stimulus                                                        | 4.84E-03 |
| mitotic prometaphase                                                     | 1.92E-03 | response to acid                                                                  | 1.75E-02 |
| G1/S transition of mitotic cell cycle                                    | 6.34E-04 | response to amino acid stimulus                                                   | 9.00E-03 |
| sister chromatid segregation                                             | 9.64E-06 | response to endoplasmic reticulum stress                                          | 5.16E-04 |
| mitotic sister chromatid segregation                                     | 1.58E-04 | cellular response to topologically incorrect protein                              | 1.75E-02 |
| mitotic metaphase/anaphase transition                                    | 1.70E-03 | cellular response to unfolded protein                                             | 9.97E-03 |
| regulation of transcription involved in G1/S phase of mitotic cell cycle | 2.97E-03 | ER-nucleus signaling pathway                                                      | 1.67E-02 |
| regulation of cell cycle                                                 | 9.28E-05 | endoplasmic reticulum unfolded protein response                                   | 9.47E-03 |
| regulation of cell cycle process                                         | 5.66E-06 | intrinsic apoptotic signaling pathway                                             | 3.69E-03 |
| negative regulation of cell cycle process                                | 4.16E-03 | intrinsic apoptotic signaling pathway in response to endoplasmic reticulum stress | 1.40E-02 |
| regulation of mitotic cell cycle                                         | 5.42E-05 | adrenal gland development                                                         | 1.79E-02 |
| regulation of G2/M transition of mitotic cell cycle                      | 3.10E-04 | folic acid-containing compound metabolic process                                  | 2.00E-02 |
| negative regulation of cell cycle                                        | 3.94E-05 | tetrahydrofolate metabolic process                                                | 5.83E-03 |
| cell cycle arrest                                                        | 4.74E-05 | carboxylic acid metabolic process                                                 | 3.64E-07 |
| regulation of cell cycle arrest                                          | 1.09E-05 | cellular amino acid metabolic process                                             | 4.02E-10 |
| cell cycle checkpoint                                                    | 4.71E-06 | amino acid activation                                                             | 1.00E-05 |
| spindle checkpoint                                                       | 3.73E-05 | alpha-amino acid metabolic process                                                | 1.01E-04 |
| spindle assembly checkpoint                                              | 4.46E-04 | serine family amino acid metabolic process                                        | 1.62E-06 |
| G2/M transition checkpoint                                               | 1.78E-02 | homoserine metabolic process                                                      | 1.17E-03 |
| mitotic cell cycle checkpoint                                            | 3.65E-06 | L-serine metabolic process                                                        | 1.77E-08 |
| mitotic cell cycle spindle checkpoint                                    | 1.95E-05 | organonitrogen compound biosynthetic process                                      | 3.46E-04 |
| mitotic cell cycle G2/M transition checkpoint                            | 2.90E-04 | single-organism biosynthetic process                                              | 4.43E-04 |
| regulation of chromosome segregation                                     | 3.38E-03 | small molecule biosynthetic process                                               | 1.64E-03 |
| regulation of growth                                                     | 1.53E-02 | organic acid biosynthetic process                                                 | 7.91E-05 |
| negative regulation of gene expression                                   | 4.09E-03 | carboxylic acid biosynthetic process                                              | 7.91E-05 |
| regulation of nuclear division                                           | 3.83E-03 | cellular amino acid biosynthetic process                                          | 2.71E-08 |
| regulation of mitosis                                                    | 3.83E-03 | serine family amino acid biosynthetic process                                     | 9.81E-09 |
| regulation of mitotic metaphase/anaphase transition                      | 1.02E-03 | alpha-amino acid biosynthetic process                                             | 2.06E-07 |
| glycosaminoglycan metabolic process                                      | 1.93E-02 | L-serine biosynthetic process                                                     | 4.99E-08 |
| regeneration                                                             | 1.27E-02 | tRNA metabolic process                                                            | 3.30E-04 |
| cell part morphogenesis                                                  | 7.61E-03 | tRNA aminoacylation                                                               | 1.00E-05 |
| cell projection morphogenesis                                            | 6.49E-03 | tRNA aminoacylation for protein translation                                       | 5.93E-06 |
| negative regulation of nuclear division                                  | 9.26E-04 | cysteine biosynthetic process                                                     | 6.98E-03 |
| negative regulation of mitosis                                           | 9.26E-04 | transsulfuration                                                                  | 1.17E-03 |
| negative regulation of mitotic metaphase/anaphase transition             | 4.46E-04 | ligase activity                                                                   | 8.60E-05 |
| mitotic cell cycle spindle assembly checkpoint                           | 3.97E-04 | ligase activity, forming carbon-oxygen bonds                                      | 3.35E-06 |
| cell morphogenesis involved in differentiation                           | 2.54E-03 | ligase activity, forming aminoacyl-tRNA and related compounds                     | 3.35E-06 |
| DNA conformation change                                                  | 1.51E-07 | aminoacyl-tRNA ligase activity                                                    | 3.35E-06 |
| DNA packaging                                                            | 3.33E-06 | organic acid transmembrane transporter activity                                   | 2.04E-03 |
| chromosome condensation                                                  | 7.82E-06 | organic anion transmembrane transporter activity                                  | 4.24E-03 |
| DNA recombination                                                        | 4.89E-03 | carboxylic acid transmembrane transporter activity                                | 1.74E-03 |
| mitotic recombination                                                    | 1.23E-02 | amino acid transmembrane transporter activity                                     | 1.75E-04 |
| DNA strand elongation                                                    | 1.33E-02 | neutral amino acid transmembrane transporter activity                             | 3.33E-04 |
| DNA replication                                                          | 4.05E-04 | L-proline transmembrane transporter activity                                      | 1.16E-02 |
| DNA-dependent DNA replication                                            | 2.01E-04 | identical protein binding                                                         | 1.40E-02 |
| DNA strand elongation involved in DNA replication                        | 1.05E-02 | protein homodimerization activity                                                 | 6.20E-03 |
| DNA repair                                                               | 9.90E-03 | methylenetetrahydrofolate dehydrogenase (NADP+) activity                          | 6.98E-03 |
| base-excision repair                                                     | 1.55E-02 | cofactor binding                                                                  | 2.39E-03 |
| regulation of DNA metabolic process                                      | 2.43E-03 | vitamin B6 binding                                                                | 1.02E-03 |
| regulation of nervous system development                                 | 9.90E-03 | pyridoxal phosphate binding                                                       | 1.02E-03 |
| chromatin assembly or disassembly                                        | 9.68E-03 | negative regulation of skeletal muscle tissue development                         | 3.20E-02 |
| chromatin assembly                                                       | 5.12E-03 | cellular carbohydrate metabolic process                                           | 2.55E-02 |
| brain development                                                        | 7.87E-03 | glucocorticoid metabolic process                                                  | 2.74E-02 |
| forebrain development                                                    | 3.45E-04 | regulation of hormone metabolic process                                           | 2.23E-02 |
| neuron projection development                                            | 1.03E-02 | regulation of glucocorticoid biosynthetic process                                 | 3.20E-02 |
| neuron projection morphogenesis                                          | 6.51E-03 | proline transport                                                                 | 2.41E-02 |
| neuron projection regeneration                                           | 1.05E-02 | response to abiotic stimulus                                                      | 2.21E-02 |
| cell morphogenesis involved in neuron differentiation                    | 6.00E-03 | cellular response to molecule of bacterial origin                                 | 2.75E-02 |
| axonogenesis                                                             | 2.78E-03 | cellular response to lipopolysaccharide                                           | 2.26E-02 |
| axon regeneration                                                        | 5.98E-03 | response to topologically incorrect protein                                       | 2.68E-02 |
| gliogenesis                                                              | 3.88E-03 | response to organic cyclic compound                                               | 2.49E-02 |
| glial cell differentiation                                               | 1.48E-02 | response to steroid hormone stimulus                                              | 4.43E-02 |
| diencephalon development                                                 | 5.71E-03 | pteridine-containing compound metabolic process                                   | 3.62E-02 |
| microtubule anchoring                                                    | 1.14E-02 | one-carbon metabolic process                                                      | 3.31E-02 |
| attachment of spindle microtubules to chromosome                         | 1.93E-03 | tetrahydrofolate interconversion                                                  | 2.41E-02 |
| attachment of spindle microtubules to kinetochore                        | 1.40E-03 | ncRNA metabolic process                                                           | 4.96E-02 |
| pituitary gland development                                              | 1.22E-03 | cysteine metabolic process                                                        | 4.10E-02 |
| mRNA processing                                                          | 1.42E-02 | icosatetraenoic acid binding                                                      | 2.41E-02 |
| kinetochore assembly                                                     | 1.47E-02 | tRNA binding                                                                      | 3.96E-02 |



| Cluster 1 (down-regulated genes)                                                     |          |
|--------------------------------------------------------------------------------------|----------|
| GO term                                                                              | p-value  |
| positive regulation of pseudopodium assembly                                         | 1.79E-02 |
| mitotic cell cycle G2/M transition DNA damage checkpoint                             | 6.93E-03 |
| regulation of attachment of spindle microtubules to kinetochore                      | 9.97E-05 |
| retroviral genome replication                                                        | 1.18E-02 |
| regulation of retroviral genome replication                                          | 6.93E-03 |
| canonical Wnt receptor signaling pathway                                             | 7.83E-03 |
| regulation of canonical Wnt receptor signaling pathway                               | 1.01E-02 |
| negative regulation of canonical Wnt receptor signaling pathway                      | 1.01E-02 |
| striated muscle tissue development                                                   | 1.81E-02 |
| response to drug                                                                     | 1.72E-04 |
| positive regulation of cell death                                                    | 5.67E-03 |
| positive regulation of programmed cell death                                         | 1.78E-02 |
| positive regulation of apoptotic process                                             | 1.64E-02 |
| inositol lipid-mediated signaling                                                    | 2.04E-03 |
| phosphatidylinositol-mediated signaling                                              | 2.04E-03 |
| protein-DNA complex                                                                  | 3.09E-03 |
| nuclear periphery                                                                    | 2.13E-04 |
| nuclear matrix                                                                       | 1.24E-04 |
| chromosome                                                                           | 6.68E-06 |
| condensed chromosome                                                                 | 9.95E-07 |
| chromosomal part                                                                     | 6.58E-07 |
| chromosome, centromeric region                                                       | 2.81E-04 |
| condensed chromosome, centromeric region                                             | 1.40E-04 |
| kinetochore                                                                          | 2.06E-05 |
| condensed chromosome kinetochore                                                     | 8.92E-05 |
| condensin complex                                                                    | 4.97E-03 |
| paraspeckles                                                                         | 4.97E-03 |
| protein heterodimerization activity                                                  | 1.12E-02 |
| structure-specific DNA binding                                                       | 5.26E-03 |
| mRNA binding                                                                         | 2.33E-03 |
| poly(A) RNA binding                                                                  | 1.79E-02 |
| response to abiotic stimulus                                                         | 3.95E-02 |
| regulation of binding                                                                | 4.72E-02 |
| centromere complex assembly                                                          | 2.78E-02 |
| pseudopodium organization                                                            | 4.33E-02 |
| positive regulation of response to DNA damage stimulus                               | 2.62E-02 |
| G2/M transition of mitotic cell cycle                                                | 2.27E-02 |
| regulation of interphase of mitotic cell cycle                                       | 3.76E-02 |
| nucleosome organization                                                              | 4.41E-02 |
| regulation of cellular response to stress                                            | 2.09E-02 |
| negative regulation of cellular macromolecule biosynthetic process                   | 3.62E-02 |
| negative regulation of transcription, DNA-dependent                                  | 4.09E-02 |
| aminoglycan metabolic process                                                        | 2.46E-02 |
| regulation of anatomical structure morphogenesis                                     | 3.07E-02 |
| regulation of organ morphogenesis                                                    | 2.27E-02 |
| negative regulation of organelle organization                                        | 2.80E-02 |
| mitotic chromosome condensation                                                      | 2.52E-02 |
| maintenance of location in cell                                                      | 4.61E-02 |
| regulation of DNA replication                                                        | 3.59E-02 |
| nucleosome assembly                                                                  | 2.60E-02 |
| central nervous system development                                                   | 2.66E-02 |
| pseudopodium assembly                                                                | 3.83E-02 |
| regulation of pseudopodium assembly                                                  | 2.14E-02 |
| neuron development                                                                   | 2.93E-02 |
| astrocyte differentiation                                                            | 2.18E-02 |
| regulation of neurogenesis                                                           | 2.08E-02 |
| maintenance of protein location in cell                                              | 3.25E-02 |
| RNA processing                                                                       | 3.01E-02 |
| RNA splicing, via transesterification reactions                                      | 2.99E-02 |
| RNA splicing, via transesterification reactions with bulged adenosine as nucleophile | 2.70E-02 |
| mRNA splicing, via spliceosome                                                       | 2.70E-02 |
| regulation of glial cell differentiation                                             | 2.78E-02 |
| negative regulation of neuron differentiation                                        | 4.28E-02 |
| negative regulation of astrocyte differentiation                                     | 2.52E-02 |
| histone phosphorylation                                                              | 4.33E-02 |
| negative regulation of microtubule depolymerization                                  | 4.85E-02 |
| sulfur compound biosynthetic process                                                 | 4.21E-02 |
| pteridine-containing compound biosynthetic process                                   | 4.33E-02 |
| folic acid-containing compound biosynthetic process                                  | 2.14E-02 |
| regulation of Wnt receptor signaling pathway                                         | 4.72E-02 |
| negative regulation of Wnt receptor signaling pathway                                | 3.95E-02 |
| tetrahydrofolate metabolic process                                                   | 4.85E-02 |
| somatic stem cell maintenance                                                        | 2.47E-02 |
| proteasomal protein catabolic process                                                | 3.98E-02 |
| proteasomal ubiquitin-dependent protein catabolic process                            | 3.42E-02 |
| muscle tissue development                                                            | 2.28E-02 |
| muscle structure development                                                         | 5.00E-02 |
| muscle organ development                                                             | 3.46E-02 |
| response to organic cyclic compound                                                  | 2.59E-02 |
| replication fork                                                                     | 2.18E-02 |
| nucleosome                                                                           | 4.75E-02 |
| condensed chromosome outer kinetochore                                               | 2.14E-02 |
| phospholipase binding                                                                | 3.37E-02 |
| damaged DNA binding                                                                  | 2.47E-02 |
| RNA binding                                                                          | 2.88E-02 |
| gamma-catenin binding                                                                | 2.14E-02 |
| poly-purine tract binding                                                            | 3.37E-02 |

| Cluster 2 (up-regulated genes) |         |
|--------------------------------|---------|
| GO term                        | p-value |

| Cluster 5 (down-regulated genes after 24 h) |          |
|---------------------------------------------|----------|
| GO term                                     | p-value  |
| paraspeckles                                | 2.66e-02 |

| Cluster 6 (up-regulated genes after 24 h)      |          |
|------------------------------------------------|----------|
| GO term                                        | p-value  |
| organonitrogen compound biosynthetic process   | 1.46E-02 |
| single-organism biosynthetic process           | 1.24E-02 |
| small molecule biosynthetic process            | 9.87E-03 |
| carboxylic acid metabolic process              | 8.96E-04 |
| organic acid biosynthetic process              | 7.96E-04 |
| carboxylic acid biosynthetic process           | 7.96E-04 |
| cellular amino acid metabolic process          | 2.62E-05 |
| alpha-amino acid metabolic process             | 2.75E-03 |
| serine family amino acid metabolic process     | 1.02E-05 |
| L-serine metabolic process                     | 1.72E-07 |
| cellular amino acid biosynthetic process       | 1.60E-06 |
| serine family amino acid biosynthetic process  | 5.98E-08 |
| alpha-amino acid biosynthetic process          | 5.25E-07 |
| L-serine biosynthetic process                  | 7.73E-07 |
| response to endoplasmic reticulum stress       | 3.70E-02 |
| regulation of glucocorticoid metabolic process | 2.23E-02 |
| response to organic nitrogen                   | 2.18E-02 |
| homoserine metabolic process                   | 4.62E-02 |
| transsulfuration                               | 4.62E-02 |
| hydrogen sulfide metabolic process             | 4.62E-02 |
| hydrogen sulfide biosynthetic process          | 4.62E-02 |

| GO terms of down-regulated genes                                         |          |
|--------------------------------------------------------------------------|----------|
| GO term                                                                  | p-value  |
| oxidative phosphorylation                                                | 6.16E-04 |
| respiratory electron transport chain                                     | 2.33E-03 |
| ATP synthesis coupled electron transport                                 | 1.43E-04 |
| mitochondrial ATP synthesis coupled electron transport                   | 1.43E-04 |
| mitotic cell cycle                                                       | 9.98E-18 |
| regulation of cell cycle                                                 | 1.00E-08 |
| regulation of mitotic cell cycle                                         | 3.65E-06 |
| negative regulation of cell cycle                                        | 4.25E-08 |
| organelle fission                                                        | 6.39E-16 |
| nuclear division                                                         | 8.60E-17 |
| chromosome organization                                                  | 7.64E-05 |
| cell division                                                            | 1.11E-12 |
| chromosome segregation                                                   | 6.05E-08 |
| regulation of chromosome segregation                                     | 9.83E-03 |
| microtubule-based process                                                | 4.84E-05 |
| microtubule cytoskeleton organization                                    | 1.17E-02 |
| cell cycle phase                                                         | 3.45E-16 |
| M phase                                                                  | 5.73E-14 |
| M phase of mitotic cell cycle                                            | 1.98E-16 |
| spindle organization                                                     | 1.03E-04 |
| interphase                                                               | 4.00E-07 |
| interphase of mitotic cell cycle                                         | 1.80E-07 |
| mitosis                                                                  | 8.60E-17 |
| mitotic prometaphase                                                     | 9.81E-06 |
| regulation of cell cycle process                                         | 1.19E-10 |
| G1/S transition of mitotic cell cycle                                    | 6.44E-04 |
| cell cycle arrest                                                        | 3.93E-07 |
| regulation of cell cycle arrest                                          | 2.00E-07 |
| cell cycle checkpoint                                                    | 4.29E-08 |
| spindle checkpoint                                                       | 5.69E-04 |
| mitotic cell cycle checkpoint                                            | 4.97E-05 |
| mitotic cell cycle spindle checkpoint                                    | 4.97E-03 |
| positive regulation of cell cycle process                                | 1.34E-02 |
| sister chromatid segregation                                             | 1.21E-06 |
| mitotic sister chromatid segregation                                     | 1.48E-05 |
| mitotic spindle organization                                             | 1.51E-04 |
| mitotic metaphase/anaphase transition                                    | 1.70E-03 |
| regulation of transcription involved in G1/S phase of mitotic cell cycle | 6.13E-06 |
| regulation of nuclear division                                           | 5.21E-04 |
| negative regulation of nuclear division                                  | 1.07E-02 |
| regulation of mitosis                                                    | 5.21E-04 |
| regulation of mitotic metaphase/anaphase transition                      | 6.73E-04 |
| negative regulation of mitosis                                           | 1.07E-02 |
| negative regulation of mitotic metaphase/anaphase transition             | 3.53E-03 |
| regulation of G2/M transition of mitotic cell cycle                      | 2.02E-03 |
| DNA packaging                                                            | 6.67E-03 |
| chromosome condensation                                                  | 6.12E-05 |
| DNA replication                                                          | 3.56E-05 |
| mitotic cell cycle G2/M transition checkpoint                            | 8.18E-03 |
| chromosome localization                                                  | 9.83E-03 |
| establishment of chromosome localization                                 | 9.83E-03 |
| cell morphogenesis involved in differentiation                           | 2.69E-03 |
| central nervous system development                                       | 7.21E-03 |
| regulation of cell development                                           | 4.59E-03 |
| regulation of nervous system development                                 | 7.80E-04 |

| GO terms of up-regulated genes                        |          |
|-------------------------------------------------------|----------|
| GO term                                               | p-value  |
| muscle system process                                 | 9.49E-03 |
| circulatory system development                        | 1.17E-02 |
| cardiovascular system development                     | 1.17E-02 |
| synaptic transmission                                 | 1.75E-02 |
| angiogenesis                                          | 4.36E-03 |
| regulation of angiogenesis                            | 1.03E-02 |
| organonitrogen compound biosynthetic process          | 6.57E-03 |
| cellular amino acid biosynthetic process              | 3.01E-03 |
| serine family amino acid biosynthetic process         | 1.70E-02 |
| alpha-amino acid biosynthetic process                 | 7.87E-03 |
| L-serine biosynthetic process                         | 3.38E-04 |
| substrate-specific transmembrane transporter activity | 2.70E-03 |
| ion transmembrane transporter activity                | 6.66E-04 |
| cation transmembrane transporter activity             | 1.03E-03 |
| metal ion transmembrane transporter activity          | 9.97E-03 |
| cation channel activity                               | 7.90E-03 |
| voltage-gated cation channel activity                 | 7.41E-03 |
| response to lipid                                     | 3.89E-02 |
| muscle contraction                                    | 2.22E-02 |
| multicellular organismal signaling                    | 4.53E-02 |
| blood vessel development                              | 3.38E-02 |
| blood vessel morphogenesis                            | 3.29E-02 |
| regulation of vasculature development                 | 2.35E-02 |
| L-serine metabolic process                            | 2.22E-02 |
| passive transmembrane transporter activity            | 2.28E-02 |
| channel activity                                      | 2.28E-02 |
| substrate-specific channel activity                   | 3.16E-02 |
| ion channel activity                                  | 2.33E-02 |



| GO term | GO terms of down-regulated genes                 | p-value  |
|---------|--------------------------------------------------|----------|
|         | regulation of neurogenesis                       | 7.68E-04 |
|         | chromosome passenger complex                     | 1.00E-02 |
|         | midbody                                          | 5.90E-03 |
|         | chromosome                                       | 4.53E-05 |
|         | condensed chromosome                             | 1.71E-03 |
|         | chromosomal part                                 | 1.25E-04 |
|         | chromosome, centromeric region                   | 2.27E-04 |
|         | condensed chromosome, centromeric region         | 1.14E-04 |
|         | condensed nuclear chromosome, centromeric region | 1.74E-02 |
|         | kinetochore                                      | 3.75E-03 |
|         | condensed chromosome kinetochore                 | 6.82E-04 |
|         | microtubule cytoskeleton                         | 2.29E-05 |
|         | spindle                                          | 3.28E-10 |
|         | spindle pole                                     | 2.09E-03 |
|         | electron transport chain                         | 2.41E-02 |
|         | cellular respiration                             | 4.64E-02 |
|         | DNA conformation change                          | 3.24E-02 |
|         | trigeminal nerve development                     | 4.93E-02 |
|         | brain development                                | 3.19E-02 |
|         | regulation of neuron differentiation             | 3.57E-02 |
|         | respiratory chain                                | 2.05E-02 |

| GO term | GO terms of up-regulated genes | p-value |
|---------|--------------------------------|---------|
|---------|--------------------------------|---------|
